# Supplementary material for: Host-microbe multiomic profiling identifies distinct COVID-19 immune dysregulation in solid organ transplant recipients
Source: Nat Commun. 2025 Jan 10;16:586. doi: 10.1038/s41467-025-55823-z (PMC11723965; doi:10.1038/s41467-025-55823-z)
Supplement: Supplementary file 3 — Supplementary Data 1 [file 41467_2025_55823_MOESM3_ESM.xlsx]

## Sheet: Supp Data 1
ensembl_id	gene_name	logFC	pvalue	adj_pvalue
ENSG00000135925	WNT10A	-1.68788	7.74489e-10	1.37712e-05
ENSG00000211896	IGHG1	-3.00264	1.55673e-09	1.38401e-05
ENSG00000165209	STRBP	-0.812464	6.19201e-09	3.48234e-05
ENSG00000112208	BAG2	-0.797274	7.83385e-09	3.48234e-05
ENSG00000073111	MCM2	-0.881063	1.92881e-08	5.07607e-05
ENSG00000149428	HYOU1	-0.806294	1.97981e-08	5.07607e-05
ENSG00000076382	SPAG5	-0.955078	2.1334e-08	5.07607e-05
ENSG00000166508	MCM7	-0.680916	2.28382e-08	5.07607e-05
ENSG00000170476	MZB1	-2.04484	2.7508e-08	5.43466e-05
ENSG00000111602	TIMELESS	-0.678518	3.21561e-08	5.71767e-05
ENSG00000165272	AQP3	-1.00269	4.83407e-08	7.12511e-05
ENSG00000117143	UAP1	-0.786313	4.86591e-08	7.12511e-05
ENSG00000101057	MYBL2	-1.36001	5.56468e-08	7.12511e-05
ENSG00000049768	FOXP3	-1.01085	5.61e-08	7.12511e-05
ENSG00000156234	CXCL13	1.87294	6.41337e-08	7.60241e-05
ENSG00000277586	NEFL	-1.76476	7.83779e-08	8.71023e-05
ENSG00000177602	HASPIN	-1.27879	9.09946e-08	9.5175e-05
ENSG00000143476	DTL	-1.2649	1.18889e-07	0.000112105
ENSG00000180535	BHLHA15	-2.44712	1.2451e-07	0.000112105
ENSG00000135916	ITM2C	-1.2888	1.26095e-07	0.000112105
ENSG00000094804	CDC6	-1.28191	1.93626e-07	0.000163946
ENSG00000242472	IGHJ5	-1.8388	2.19089e-07	0.000177074
ENSG00000211640	IGLV6-57	-2.65702	2.7827e-07	0.000206406
ENSG00000132465	JCHAIN	-2.09157	2.79855e-07	0.000206406
ENSG00000110660	SLC35F2	-0.850511	2.90206e-07	0.000206406
ENSG00000142675	CNKSR1	-1.34414	3.09458e-07	0.000206448
ENSG00000211933	IGHV6-1	-2.47894	3.13487e-07	0.000206448
ENSG00000211660	IGLV2-23	-2.29436	3.53357e-07	0.00021989
ENSG00000224650	IGHV3-74	-2.18406	3.5863e-07	0.00021989
ENSG00000211897	IGHG3	-2.45169	3.71213e-07	0.000220018
ENSG00000211934	IGHV1-2	-2.43449	4.46745e-07	0.000253136
ENSG00000211659	IGLV3-25	-2.66073	4.55562e-07	0.000253136
ENSG00000091490	SEL1L3	-0.828298	4.77233e-07	0.000257142
ENSG00000225434	LINC01504	0.606904	5.11053e-07	0.000267266
ENSG00000076003	MCM6	-0.600158	5.62676e-07	0.000285855
ENSG00000104738	MCM4	-0.797351	5.98918e-07	0.000295787
ENSG00000123989	CHPF	-1.09783	6.15495e-07	0.000295787
ENSG00000160957	RECQL4	-0.968107	6.87077e-07	0.000321498
ENSG00000282600	IGHV3-69-1	-2.07604	7.45109e-07	0.000329723
ENSG00000141384	TAF4B	-0.886297	7.53785e-07	0.000329723
ENSG00000011590	ZBTB32	-1.11589	7.60286e-07	0.000329723
ENSG00000135144	DTX1	-1.25218	8.79862e-07	0.000372496
ENSG00000280411	IGHV1-69D	-2.39424	9.46024e-07	0.000391192
ENSG00000183010	PYCR1	-1.43701	9.98404e-07	0.000394769
ENSG00000169116	PARM1	-1.62159	9.99078e-07	0.000394769
ENSG00000172071	EIF2AK3	-0.710442	1.05921e-06	0.000407484
ENSG00000237111	IGHJ3P	-1.56999	1.08671e-06	0.000407484
ENSG00000211947	IGHV3-21	-2.17747	1.11181e-06	0.000407484
ENSG00000102096	PIM2	-0.72459	1.12293e-06	0.000407484
ENSG00000145911	N4BP3	-1.04765	1.22664e-06	0.000427246
ENSG00000176658	MYO1D	-0.922134	1.22783e-06	0.000427246
ENSG00000237649	KIFC1	-0.992117	1.24947e-06	0.000427246
ENSG00000164530	PI16	-0.973366	1.35945e-06	0.00045579
ENSG00000134910	STT3A	-0.552215	1.38421e-06	0.00045579
ENSG00000211892	IGHG4	-2.85047	1.51807e-06	0.000489513
ENSG00000139193	CD27	-0.807518	1.54169e-06	0.000489513
ENSG00000104635	SLC39A14	-0.904865	1.74674e-06	0.00053853
ENSG00000171241	SHCBP1	-1.08415	1.75664e-06	0.00053853
ENSG00000119333	WDR34	-0.716686	1.81423e-06	0.000546759
ENSG00000101194	SLC17A9	-0.70817	1.96793e-06	0.0005629
ENSG00000137310	TCF19	-0.672718	1.9858e-06	0.0005629
ENSG00000144152	FBLN7	-1.03731	2.00454e-06	0.0005629
ENSG00000161643	SIGLEC16	0.895552	2.0199e-06	0.0005629
ENSG00000154277	UCHL1	-2.07001	2.02607e-06	0.0005629
ENSG00000198208	RPS6KL1	-0.989366	2.15239e-06	0.0005848
ENSG00000169962	TAS1R3	-0.992951	2.23556e-06	0.0005848
ENSG00000137502	RAB30	-0.797957	2.24267e-06	0.0005848
ENSG00000075702	WDR62	-0.845695	2.24749e-06	0.0005848
ENSG00000270550	IGHV3-30	-2.1131	2.26934e-06	0.0005848
ENSG00000106462	EZH2	-0.493562	2.49498e-06	0.000633724
ENSG00000167861	HID1	-1.06643	2.53048e-06	0.000633724
ENSG00000101447	FAM83D	-0.735943	2.57427e-06	0.000635739
ENSG00000211955	IGHV3-33	-2.2751	2.63091e-06	0.000640824
ENSG00000092470	WDR76	-0.618415	2.81194e-06	0.000675664
ENSG00000109654	TRIM2	-1.23104	3.02914e-06	0.00071815
ENSG00000173848	NET1	-0.531615	3.07162e-06	0.000718637
ENSG00000178445	GLDC	-1.83093	3.16194e-06	0.000730161
ENSG00000224373	IGHV4-59	-1.95201	3.25412e-06	0.000741815
ENSG00000211658	IGLV3-27	-3.15297	3.3323e-06	0.000750021
ENSG00000211951	IGHV2-26	-2.87236	3.49185e-06	0.000772522
ENSG00000111291	GPRC5D	-1.90201	3.64124e-06	0.000772522
ENSG00000211653	IGLV1-40	-2.09469	3.65066e-06	0.000772522
ENSG00000242887	IGHJ3	-1.60675	3.66228e-06	0.000772522
ENSG00000071539	TRIP13	-1.09758	3.66411e-06	0.000772522
ENSG00000211662	IGLV3-21	-2.16606	3.69295e-06	0.000772522
ENSG00000211599	IGKV5-2	-2.28819	3.78101e-06	0.000777456
ENSG00000211962	IGHV1-46	-2.2467	3.82985e-06	0.000777456
ENSG00000211966	IGHV5-51	-2.04339	3.84771e-06	0.000777456
ENSG00000174136	RGMB	-1.04707	3.9253e-06	0.000784221
ENSG00000109501	WFS1	-0.791366	3.97824e-06	0.000785968
ENSG00000099958	DERL3	-1.461	4.15037e-06	0.00080065
ENSG00000211899	IGHM	-1.63682	4.15293e-06	0.00080065
ENSG00000277856	AC233755.2	-2.97594	4.18764e-06	0.00080065
ENSG00000240041	IGHJ4	-1.55243	4.36271e-06	0.000825248
ENSG00000221829	FANCG	-0.506162	4.43054e-06	0.000829256
ENSG00000109762	SNX25	-0.828295	4.49914e-06	0.000833324
ENSG00000105486	LIG1	-0.491113	4.83969e-06	0.000873923
ENSG00000161640	SIGLEC11	1.08198	4.83998e-06	0.000873923
ENSG00000170456	DENND5B	-1.19585	4.86578e-06	0.000873923
ENSG00000115884	SDC1	-2.61203	5.00497e-06	0.000877558
ENSG00000263327	TAPT1-AS1	-0.649539	5.01698e-06	0.000877558
ENSG00000230006	ANKRD36BP2	-1.21196	5.05544e-06	0.000877558
ENSG00000111206	FOXM1	-0.886828	5.15102e-06	0.000877558
ENSG00000147535	PLPP5	-0.561701	5.23588e-06	0.000877558
ENSG00000117519	CNN3	-1.09761	5.24876e-06	0.000877558
ENSG00000169679	BUB1	-1.16141	5.29913e-06	0.000877558
ENSG00000233387	AL121748.1	-1.01493	5.31829e-06	0.000877558
ENSG00000143297	FCRL5	-1.46596	5.3302e-06	0.000877558
ENSG00000178038	ALS2CL	-0.953003	5.44892e-06	0.000879041
ENSG00000166598	HSP90B1	-0.754047	5.46392e-06	0.000879041
ENSG00000151135	TMEM263	-0.586314	5.48752e-06	0.000879041
ENSG00000173372	C1QA	1.0271	5.66485e-06	0.000899345
ENSG00000171643	S100Z	0.612069	5.87455e-06	0.000924384
ENSG00000137265	IRF4	-0.792539	6.01606e-06	0.000938348
ENSG00000100297	MCM5	-0.456261	6.14942e-06	0.000942083
ENSG00000276043	UHRF1	-0.799683	6.19041e-06	0.000942083
ENSG00000211945	IGHV1-18	-1.92127	6.20993e-06	0.000942083
ENSG00000280670	CCDC163	-0.910356	6.25194e-06	0.000942083
ENSG00000239264	TXNDC5	-1.82277	6.34289e-06	0.000944414
ENSG00000140525	FANCI	-0.572299	6.37364e-06	0.000944414
ENSG00000125648	SLC25A23	-0.715664	6.58941e-06	0.000961641
ENSG00000048462	TNFRSF17	-2.1698	6.59806e-06	0.000961641
ENSG00000156886	ITGAD	1.50668	7.07213e-06	0.00102235
ENSG00000211950	IGHV1-24	-2.7794	7.1413e-06	0.00102403
ENSG00000149970	CNKSR2	-0.839213	7.34232e-06	0.00103741
ENSG00000211669	IGLV3-10	-2.70222	7.35129e-06	0.00103741
ENSG00000085840	ORC1	-0.839986	7.46763e-06	0.00103908
ENSG00000174371	EXO1	-1.14776	7.50089e-06	0.00103908
ENSG00000059573	ALDH18A1	-0.599808	7.53844e-06	0.00103908
ENSG00000211632	IGKV3D-11	-1.94309	7.62087e-06	0.00104236
ENSG00000216775	AL109918.1	-1.61512	7.7247e-06	0.0010485
ENSG00000198380	GFPT1	-0.378476	8.26222e-06	0.00110982
ENSG00000232216	IGHV3-43	-2.2819	8.30137e-06	0.00110982
ENSG00000078900	TP73	-1.33422	8.55954e-06	0.00113226
ENSG00000109685	NSD2	-0.441231	8.59654e-06	0.00113226
ENSG00000211956	IGHV4-34	-2.0359	9.32251e-06	0.00121885
ENSG00000183813	CCR4	-0.75465	9.5843e-06	0.00124393
ENSG00000118971	CCND2	-0.672776	9.79005e-06	0.00124874
ENSG00000185155	MIXL1	-1.77535	9.85487e-06	0.00124874
ENSG00000152256	PDK1	-0.430008	9.93852e-06	0.00124874
ENSG00000106624	AEBP1	-0.880433	9.9697e-06	0.00124874
ENSG00000128438	TBC1D27P	-1.45721	1.00132e-05	0.00124874
ENSG00000124225	PMEPA1	-0.978738	1.0155e-05	0.00124874
ENSG00000105699	LSR	-0.573816	1.01762e-05	0.00124874
ENSG00000166927	MS4A7	0.623367	1.01832e-05	0.00124874
ENSG00000211900	IGHJ6	-1.72893	1.07194e-05	0.0013055
ENSG00000120254	MTHFD1L	-0.664649	1.09736e-05	0.00132123
ENSG00000124207	CSE1L	-0.423189	1.09972e-05	0.00132123
ENSG00000148468	FAM171A1	-0.951153	1.1296e-05	0.00134802
ENSG00000076554	TPD52	-0.846529	1.13944e-05	0.00135069
ENSG00000083720	OXCT1	-0.542361	1.23377e-05	0.0014439
ENSG00000074695	LMAN1	-0.726184	1.23431e-05	0.0014439
ENSG00000065150	IPO5	-0.409651	1.29246e-05	0.00150204
ENSG00000172345	STARD5	-0.492446	1.33525e-05	0.0015417
ENSG00000172123	SLFN12	0.499104	1.37155e-05	0.00156591
ENSG00000211648	IGLV1-47	-2.05342	1.37383e-05	0.00156591
ENSG00000211959	IGHV4-39	-2.13885	1.38937e-05	0.00157353
ENSG00000211938	IGHV3-7	-1.9338	1.39925e-05	0.00157469
ENSG00000163527	STT3B	-0.420116	1.41502e-05	0.00158242
ENSG00000162062	TEDC2	-1.09103	1.46153e-05	0.00162422
ENSG00000211891	IGHE	-1.71669	1.54286e-05	0.00170395
ENSG00000100714	MTHFD1	-0.441537	1.58887e-05	0.00174393
ENSG00000144645	OSBPL10	-0.928195	1.60966e-05	0.00175591
ENSG00000211594	IGKJ4	-1.52643	1.62168e-05	0.00175824
ENSG00000122952	ZWINT	-0.849296	1.67465e-05	0.00179095
ENSG00000111445	RFC5	-0.395416	1.67962e-05	0.00179095
ENSG00000112742	TTK	-1.04307	1.68206e-05	0.00179095
ENSG00000277836	AC141272.1	-1.98292	1.71673e-05	0.00180683
ENSG00000211595	IGKJ3	-1.42893	1.71731e-05	0.00180683
ENSG00000139132	FGD4	0.512781	1.73878e-05	0.0018172
ENSG00000211666	IGLV2-14	-1.43761	1.7476e-05	0.0018172
ENSG00000211598	IGKV4-1	-1.99646	1.77347e-05	0.00182833
ENSG00000184445	KNTC1	-0.544167	1.77887e-05	0.00182833
ENSG00000147536	GINS4	-0.627299	1.82031e-05	0.00186017
ENSG00000149554	CHEK1	-0.663691	1.92407e-05	0.00195228
ENSG00000112029	FBXO5	-0.636151	1.93241e-05	0.00195228
ENSG00000211895	IGHA1	-1.78197	1.94387e-05	0.00195277
ENSG00000103089	FA2H	-1.4691	2.0034e-05	0.00199218
ENSG00000233999	IGKV3OR2-268	-1.55423	2.00551e-05	0.00199218
ENSG00000138166	DUSP5	-0.819817	2.03377e-05	0.00200357
ENSG00000240505	TNFRSF13B	-1.56327	2.059e-05	0.00200357
ENSG00000130787	HIP1R	-0.669746	2.06197e-05	0.00200357
ENSG00000239975	IGKV1D-33	-1.71813	2.06205e-05	0.00200357
ENSG00000186603	HPDL	-0.987753	2.09045e-05	0.00201296
ENSG00000170074	FAM153A	-1.01209	2.09894e-05	0.00201296
ENSG00000197635	DPP4	-0.809206	2.10568e-05	0.00201296
ENSG00000244437	IGKV3-15	-1.76606	2.13193e-05	0.00202716
ENSG00000256039	LINC02446	0.892951	2.16612e-05	0.00204871
ENSG00000135069	PSAT1	-0.754683	2.18074e-05	0.00205163
ENSG00000198585	NUDT16	0.524652	2.20751e-05	0.00206446
ENSG00000085999	RAD54L	-0.872697	2.21761e-05	0.00206446
ENSG00000134460	IL2RA	-0.708652	2.26332e-05	0.00209327
ENSG00000211644	IGLV1-51	-1.86413	2.29118e-05	0.00209327
ENSG00000246430	LINC00968	0.582872	2.29269e-05	0.00209327
ENSG00000179222	MAGED1	-0.573819	2.29564e-05	0.00209327
ENSG00000083454	P2RX5	-0.661612	2.34649e-05	0.00211656
ENSG00000211668	IGLV2-11	-1.67415	2.3488e-05	0.00211656
ENSG00000100629	CEP128	-0.638733	2.35781e-05	0.00211656
ENSG00000136982	DSCC1	-0.846035	2.36879e-05	0.00211656
ENSG00000240864	IGKV1-16	-2.07258	2.40449e-05	0.00212781
ENSG00000211651	IGLV1-44	-1.83701	2.40531e-05	0.00212781
ENSG00000156802	ATAD2	-0.442362	2.41951e-05	0.00212977
ENSG00000137822	TUBGCP4	-0.405331	2.45138e-05	0.00214719
ENSG00000211643	IGLV5-52	-0.870839	2.48981e-05	0.00216978
ENSG00000187676	B3GLCT	-0.474832	2.50158e-05	0.00216978
ENSG00000211967	IGHV3-53	-2.0503	2.51865e-05	0.00217398
ENSG00000044574	HSPA5	-0.510944	2.5408e-05	0.00218251
ENSG00000051341	POLQ	-0.963211	2.57756e-05	0.00220344
ENSG00000243290	IGKV1-12	-1.89311	2.75074e-05	0.00234024
ENSG00000100298	APOBEC3H	0.589566	2.77066e-05	0.00234223
ENSG00000173540	GMPPB	-0.547479	2.80107e-05	0.00234223
ENSG00000259772	AC012236.1	-1.36788	2.80434e-05	0.00234223
ENSG00000143674	MAP3K21	-0.608465	2.80578e-05	0.00234223
ENSG00000142156	COL6A1	-1.03222	2.84782e-05	0.00236622
ENSG00000211952	IGHV4-28	-1.94966	2.90461e-05	0.00240218
ENSG00000265612	MIR4539	-1.19775	2.99857e-05	0.00246255
ENSG00000152689	RASGRP3	-0.610081	3.00531e-05	0.00246255
ENSG00000107719	PALD1	-1.26634	3.0336e-05	0.00247433
ENSG00000128965	CHAC1	-1.22416	3.13633e-05	0.00253128
ENSG00000159259	CHAF1B	-0.598013	3.15965e-05	0.00253128
ENSG00000095585	BLNK	-0.797233	3.16723e-05	0.00253128
ENSG00000100162	CENPM	-0.689904	3.17332e-05	0.00253128
ENSG00000131153	GINS2	-0.874244	3.1746e-05	0.00253128
ENSG00000003249	DBNDD1	-1.20867	3.22522e-05	0.00255122
ENSG00000197794	IGKV7-3	-1.45297	3.2283e-05	0.00255122
ENSG00000178104	PDE4DIP	-0.424466	3.26206e-05	0.00256063
ENSG00000127564	PKMYT1	-0.897684	3.26901e-05	0.00256063
ENSG00000142731	PLK4	-0.696996	3.29298e-05	0.00256809
ENSG00000159958	TNFRSF13C	-1.11158	3.38917e-05	0.00260026
ENSG00000142945	KIF2C	-0.880931	3.39711e-05	0.00260026
ENSG00000211655	IGLV1-36	-2.41541	3.39996e-05	0.00260026
ENSG00000164109	MAD2L1	-0.677222	3.41131e-05	0.00260026
ENSG00000168078	PBK	-1.19649	3.41699e-05	0.00260026
ENSG00000278196	IGLV2-8	-1.87313	3.42197e-05	0.00260026
ENSG00000134690	CDCA8	-0.661072	3.47151e-05	0.00262668
ENSG00000156398	SFXN2	-0.56925	3.48765e-05	0.00262771
ENSG00000093009	CDC45	-0.867448	3.52688e-05	0.00263482
ENSG00000211670	IGLV3-9	-2.02997	3.54022e-05	0.00263482
ENSG00000143515	ATP8B2	-0.691435	3.54155e-05	0.00263482
ENSG00000211937	IGHV2-5	-2.01807	3.5687e-05	0.00264396
ENSG00000243238	IGKV2-30	-2.051	3.58866e-05	0.00264772
ENSG00000100600	LGMN	-0.519319	3.63412e-05	0.00267018
ENSG00000148737	TCF7L2	0.456238	3.65797e-05	0.00267048
ENSG00000211893	IGHG2	-1.65078	3.66456e-05	0.00267048
ENSG00000239855	IGKV1-6	-2.04706	3.71038e-05	0.00268223
ENSG00000157379	DHRS1	0.310708	3.71086e-05	0.00268223
ENSG00000171848	RRM2	-1.00877	3.77802e-05	0.00271971
ENSG00000211968	IGHV1-58	-2.4659	3.90674e-05	0.00280104
ENSG00000211949	IGHV3-23	-1.68811	3.94021e-05	0.00280796
ENSG00000167513	CDT1	-0.832009	3.94798e-05	0.00280796
ENSG00000160949	TONSL	-0.518164	4.14538e-05	0.00292544
ENSG00000125166	GOT2	-0.37696	4.16745e-05	0.00292544
ENSG00000222037	IGLC6	-1.80579	4.18e-05	0.00292544
ENSG00000166451	CENPN	-0.536298	4.19176e-05	0.00292544
ENSG00000099953	MMP11	-1.10054	4.20895e-05	0.00292544
ENSG00000082438	COBLL1	-0.87206	4.21187e-05	0.00292544
ENSG00000173715	C11orf80	-0.546053	4.51371e-05	0.00312289
ENSG00000180198	RCC1	-0.412783	4.54823e-05	0.00313457
ENSG00000147475	ERLIN2	0.317942	4.67771e-05	0.00321136
ENSG00000242076	IGKV1-33	-1.69951	4.70495e-05	0.00321764
ENSG00000211592	IGKC	-1.67827	4.74173e-05	0.00323037
ENSG00000211665	IGLV3-16	-2.1454	4.78238e-05	0.00323868
ENSG00000211673	IGLV3-1	-1.92203	4.79036e-05	0.00323868
ENSG00000079435	LIPE	-0.589072	4.84951e-05	0.00326625
ENSG00000079931	MOXD1	-1.44412	4.92513e-05	0.00330467
ENSG00000211970	IGHV4-61	-1.953	4.96852e-05	0.00332125
ENSG00000105173	CCNE1	-0.844294	4.99133e-05	0.003324
ENSG00000112210	RAB23	-0.824399	5.05209e-05	0.00334146
ENSG00000211943	IGHV3-15	-1.85153	5.06811e-05	0.00334146
ENSG00000223350	IGLV9-49	-2.15885	5.07392e-05	0.00334146
ENSG00000123095	BHLHE41	-1.33034	5.13012e-05	0.003366
ENSG00000164045	CDC25A	-1.08464	5.31651e-05	0.00347547
ENSG00000066855	MTFR1	-0.351756	5.56149e-05	0.00361856
ENSG00000163918	RFC4	-0.494957	5.59474e-05	0.00361856
ENSG00000064651	SLC12A2	-0.512271	5.61544e-05	0.00361856
ENSG00000155380	SLC16A1	-0.494583	5.61679e-05	0.00361856
ENSG00000125170	DOK4	-0.763352	5.7062e-05	0.00366288
ENSG00000115902	SLC1A4	-0.571438	5.76183e-05	0.00368529
ENSG00000211637	IGLV4-69	-2.12869	5.81987e-05	0.00370907
ENSG00000167325	RRM1	-0.472383	5.87669e-05	0.00373191
ENSG00000128050	PAICS	-0.511081	6.10052e-05	0.00386026
ENSG00000211638	IGLV8-61	-2.48842	6.25054e-05	0.00394117
ENSG00000183397	C19orf71	-0.680456	6.29922e-05	0.00395783
ENSG00000172731	LRRC20	-0.600661	6.33663e-05	0.00396731
ENSG00000211941	IGHV3-11	-1.84513	6.42628e-05	0.00400932
ENSG00000168496	FEN1	-0.552171	6.45117e-05	0.00401078
ENSG00000004478	FKBP4	-0.443569	6.55147e-05	0.00405894
ENSG00000240382	IGKV1-17	-2.1534	6.59737e-05	0.00407319
ENSG00000260807	AC009041.2	-1.20578	6.6782e-05	0.00410883
ENSG00000211597	IGKJ1	-1.20224	7.02176e-05	0.00430531
ENSG00000037897	METTL1	-0.469449	7.09821e-05	0.00433327
ENSG00000155660	PDIA4	-0.664249	7.11611e-05	0.00433327
ENSG00000167747	C19orf48	-0.454438	7.18308e-05	0.00435912
ENSG00000017483	SLC38A5	-0.673716	7.22017e-05	0.00436673
ENSG00000058804	NDC1	-0.514223	7.38263e-05	0.00444985
ENSG00000186265	BTLA	-0.766858	7.51955e-05	0.00451706
ENSG00000092096	SLC22A17	-0.71598	7.59214e-05	0.00454436
ENSG00000004468	CD38	-0.666082	7.61611e-05	0.00454436
ENSG00000135632	SMYD5	-0.385675	7.75143e-05	0.00460964
ENSG00000203950	RTL8A	0.365503	7.78267e-05	0.00461279
ENSG00000253234	IGLV2-5	-1.50251	7.85914e-05	0.00464264
ENSG00000211685	IGLC7	-2.36049	7.92513e-05	0.00465595
ENSG00000254709	IGLL5	-1.71422	7.93406e-05	0.00465595
ENSG00000186049	KRT73	-1.30231	7.99383e-05	0.0046756
ENSG00000051180	RAD51	-0.739816	8.04644e-05	0.00468502
ENSG00000125319	C17orf53	-0.648402	8.06263e-05	0.00468502
ENSG00000132704	FCRL2	-0.926474	8.13641e-05	0.00471249
ENSG00000114948	ADAM23	-1.22601	8.21926e-05	0.00474502
ENSG00000198901	PRC1	-0.55009	8.50401e-05	0.00489011
ENSG00000211663	IGLV3-19	-2.13132	8.52558e-05	0.00489011
ENSG00000171793	CTPS1	-0.388064	8.79376e-05	0.00502771
ENSG00000126602	TRAP1	-0.387613	8.85074e-05	0.00504407
ENSG00000180611	MB21D2	-0.866139	9.18653e-05	0.00521871
ENSG00000130702	LAMA5	-1.03728	9.23566e-05	0.00522992
ENSG00000133740	E2F5	-0.698056	9.31938e-05	0.00526057
ENSG00000187621	TCL6	-1.20753	9.40831e-05	0.00529396
ENSG00000143603	KCNN3	-1.36054	9.58902e-05	0.00537862
ENSG00000211964	IGHV3-48	-1.69646	9.73007e-05	0.00544058
ENSG00000119969	HELLS	-0.771446	9.83287e-05	0.005475
ENSG00000110077	MS4A6A	0.519068	9.85321e-05	0.005475
ENSG00000163611	SPICE1	-0.406744	9.88459e-05	0.00547533
ENSG00000242371	IGKV1-39	-1.74309	9.92356e-05	0.00547984
ENSG00000253364	AL928742.1	-1.25299	0.000101664	0.00559655
ENSG00000065717	TLE2	-0.870312	0.000105737	0.00580281
ENSG00000184164	CRELD2	-0.559961	0.00010729	0.00586994
ENSG00000185760	KCNQ5	-0.684549	0.000110338	0.00600163
ENSG00000091651	ORC6	-0.625716	0.000110373	0.00600163
ENSG00000186310	NAP1L3	-0.760281	0.000111084	0.00600761
ENSG00000211972	IGHV3-66	-1.78828	0.000111158	0.00600761
ENSG00000243264	IGKV2D-29	-2.09095	0.000112075	0.0060388
ENSG00000099194	SCD	-0.692917	0.000112424	0.0060393
ENSG00000117643	MAN1C1	-0.695037	0.000113523	0.00607999
ENSG00000186810	CXCR3	-0.691409	0.000114459	0.00611172
ENSG00000242265	PEG10	-1.06861	0.000115098	0.00611647
ENSG00000251546	IGKV1D-39	-1.70335	0.000115236	0.00611647
ENSG00000165480	SKA3	-0.825997	0.00011623	0.00615085
ENSG00000184661	CDCA2	-0.995874	0.000117418	0.00618172
ENSG00000189057	FAM111B	-0.968695	0.000117892	0.00618172
ENSG00000137936	BCAR3	-0.910127	0.000118051	0.00618172
ENSG00000211677	IGLC2	-1.53077	0.000118204	0.00618172
ENSG00000151491	EPS8	0.626049	0.000119212	0.00621056
ENSG00000143333	RGS16	-0.944356	0.000119454	0.00621056
ENSG00000188760	TMEM198	-1.06169	0.000119931	0.0062172
ENSG00000103365	GGA2	-0.407897	0.000121567	0.00628367
ENSG00000234965	SHISA8	-1.36515	0.000121945	0.00628495
ENSG00000173928	SWSAP1	0.340568	0.000122432	0.00629182
ENSG00000266338	NBPF15	-0.496894	0.000123942	0.00635105
ENSG00000228672	PROB1	-0.758984	0.000126247	0.00645057
ENSG00000174607	UGT8	-1.18645	0.000127257	0.00648355
ENSG00000154027	AK5	-0.80991	0.000127911	0.00649824
ENSG00000167670	CHAF1A	-0.305307	0.000128735	0.00652148
ENSG00000117399	CDC20	-0.893191	0.000129821	0.00655779
ENSG00000172009	THOP1	-0.364181	0.000130226	0.00655964
ENSG00000273472	AC096733.2	-0.618198	0.000131745	0.00661741
ENSG00000163069	SGCB	-0.480224	0.000132429	0.00663302
ENSG00000078269	SYNJ2	-0.372927	0.000132808	0.00663329
ENSG00000164362	TERT	-1.43218	0.00013369	0.00665866
ENSG00000178999	AURKB	-0.72314	0.000134705	0.00669049
ENSG00000198826	ARHGAP11A	-0.540851	0.000135865	0.0067293
ENSG00000110079	MS4A4A	0.786932	0.000137559	0.00679111
ENSG00000211930	IGHD3-3	-1.35164	0.000137877	0.00679111
ENSG00000170819	BFSP2	-1.00537	0.000138262	0.00679125
ENSG00000211672	IGLV4-3	-1.57285	0.000139963	0.00685587
ENSG00000088325	TPX2	-0.760058	0.000141626	0.00691829
ENSG00000106537	TSPAN13	-0.756587	0.000142063	0.0069206
ENSG00000239951	IGKV3-20	-1.57696	0.000142843	0.00693957
ENSG00000143870	PDIA6	-0.398713	0.000144091	0.00698113
ENSG00000168081	PNOC	-0.82414	0.000145138	0.00701276
ENSG00000185164	NOMO2	-0.55934	0.000148446	0.00715318
ENSG00000051596	THOC3	-0.422149	0.000149338	0.00717562
ENSG00000108829	LRRC59	-0.369607	0.000149719	0.00717562
ENSG00000121152	NCAPH	-0.673221	0.000150781	0.00720708
ENSG00000143799	PARP1	-0.388644	0.000152724	0.0072804
ENSG00000010319	SEMA3G	-0.958659	0.000153197	0.00728342
ENSG00000197705	KLHL14	-1.49919	0.000156772	0.00743351
ENSG00000151729	SLC25A4	-0.663251	0.000157193	0.00743364
ENSG00000120437	ACAT2	-0.298203	0.00016126	0.00760574
ENSG00000071564	TCF3	-0.726707	0.000163696	0.00770022
ENSG00000173369	C1QB	0.902789	0.000168588	0.0079094
ENSG00000167106	FAM102A	-0.638286	0.000169591	0.00793553
ENSG00000169607	CKAP2L	-0.862061	0.000170841	0.00797304
ENSG00000134072	CAMK1	0.503483	0.000172002	0.00800231
ENSG00000153064	BANK1	-0.606942	0.000172369	0.00800231
ENSG00000065328	MCM10	-0.902269	0.000173314	0.00802525
ENSG00000151725	CENPU	-0.663686	0.000175194	0.00808204
ENSG00000090861	AARS	-0.489614	0.000175449	0.00808204
ENSG00000134109	EDEM1	-0.435871	0.000176172	0.00809435
ENSG00000119599	DCAF4	-0.432477	0.000179049	0.00820535
ENSG00000226777	FAM30A	-0.743388	0.000179995	0.0082275
ENSG00000111716	LDHB	-0.372	0.000182103	0.00830251
ENSG00000112118	MCM3	-0.483977	0.000184497	0.00839012
ENSG00000151746	BICD1	-0.389472	0.000185527	0.00841546
ENSG00000097096	SYDE2	-0.763129	0.000187953	0.0085038
ENSG00000025434	NR1H3	0.419895	0.000192732	0.00869787
ENSG00000176533	GNG7	-0.605744	0.000193761	0.00872217
ENSG00000080986	NDC80	-0.508188	0.00019564	0.00878453
ENSG00000144867	SRPRB	-0.461231	0.000196492	0.00880056
ENSG00000111665	CDCA3	-0.748446	0.00019926	0.00890212
ENSG00000144749	LRIG1	-0.576492	0.000202879	0.00904109
ENSG00000182472	CAPN12	0.504254	0.000203495	0.00904585
ENSG00000132464	ENAM	-1.37938	0.000204219	0.00905541
ENSG00000183763	TRAIP	-0.525366	0.000207282	0.00916835
ENSG00000110777	POU2AF1	-1.27754	0.000208904	0.00921719
ENSG00000211649	IGLV7-46	-1.80273	0.000209591	0.00922458
ENSG00000109805	NCAPG	-0.831103	0.000210283	0.00923219
ENSG00000010803	SCMH1	-0.331821	0.00021381	0.00931534
ENSG00000110987	BCL7A	-0.616064	0.000213971	0.00931534
ENSG00000196305	IARS	-0.461311	0.000214584	0.00931534
ENSG00000101868	POLA1	-0.421599	0.000214693	0.00931534
ENSG00000116062	MSH6	-0.386026	0.000214796	0.00931534
ENSG00000185480	PARPBP	-0.540362	0.000219513	0.00949673
ENSG00000169762	TAPT1	-0.373563	0.00022056	0.00951887
ENSG00000275063	AC233755.1	-1.97426	0.000221596	0.00954042
ENSG00000136153	LMO7	-0.651536	0.000222402	0.00955201
ENSG00000139734	DIAPH3	-1.01912	0.000225646	0.00966146
ENSG00000136811	ODF2	-0.286733	0.000226037	0.00966146
ENSG00000244575	IGKV1-27	-1.86063	0.000227161	0.00968619
ENSG00000184451	CCR10	-0.941725	0.000228421	0.00971664
ENSG00000211973	IGHV1-69	-2.02076	0.00023095	0.00980075
ENSG00000274114	AC004706.3	-0.589675	0.000233902	0.00990239
ENSG00000211946	IGHV3-20	-2.15302	0.000235664	0.00995331
ENSG00000165409	TSHR	-1.06633	0.000237811	0.0100196
ENSG00000165810	BTNL9	-1.32236	0.000238361	0.0100196
ENSG00000026652	AGPAT4	0.356857	0.000242865	0.0101849
ENSG00000138795	LEF1	-0.620506	0.000249774	0.0104404
ENSG00000088340	FER1L4	-1.64679	0.0002507	0.0104404
ENSG00000103512	NOMO1	-0.424802	0.000250719	0.0104404
ENSG00000113615	SEC24A	-0.398389	0.000252567	0.0104928
ENSG00000103257	SLC7A5	-0.708256	0.000258044	0.0106917
ENSG00000235532	LINC00402	-0.934703	0.000258559	0.0106917
ENSG00000166483	WEE1	-0.529952	0.000261275	0.0107533
ENSG00000177455	CD19	-0.923871	0.000262187	0.0107533
ENSG00000241755	IGKV1-9	-1.8108	0.000262451	0.0107533
ENSG00000150967	ABCB9	-0.922366	0.000262468	0.0107533
ENSG00000062822	POLD1	-0.405551	0.000263443	0.0107684
ENSG00000211942	IGHV3-13	-2.32421	0.000264502	0.0107869
ENSG00000241351	IGKV3-11	-1.48173	0.000267794	0.0108962
ENSG00000162063	CCNF	-0.5425	0.000271312	0.0110142
ENSG00000008405	CRY1	-0.394727	0.000272083	0.0110203
ENSG00000172878	METAP1D	-0.409569	0.000273122	0.0110372
ENSG00000240449	AC005586.1	-0.802107	0.00027422	0.0110565
ENSG00000243466	IGKV1-5	-1.55865	0.000275326	0.011076
ENSG00000213420	GPC2	-0.671842	0.00027612	0.0110828
ENSG00000138074	SLC5A6	-0.38912	0.000281373	0.0112682
ENSG00000243063	IGKV3-7	-1.41353	0.00028361	0.0112936
ENSG00000211965	IGHV3-49	-1.86036	0.00028385	0.0112936
ENSG00000184307	ZDHHC23	-0.702401	0.000283913	0.0112936
ENSG00000165895	ARHGAP42	-1.04352	0.000288434	0.0114479
ENSG00000094916	CBX5	-0.333758	0.000289788	0.0114658
ENSG00000143110	C1orf162	0.484942	0.000290176	0.0114658
ENSG00000042088	TDP1	-0.316767	0.000291331	0.011486
ENSG00000137965	IFI44	0.821286	0.000292548	0.0115084
ENSG00000146670	CDCA5	-0.728725	0.000297684	0.0116846
ENSG00000091127	PUS7	-0.425237	0.000299072	0.0117132
ENSG00000075275	CELSR1	-0.752216	0.000300478	0.0117424
ENSG00000149136	SSRP1	-0.327066	0.000301561	0.0117589
ENSG00000211647	IGLV5-48	-1.69901	0.000304515	0.0118481
ENSG00000248571	AC106882.1	-1.01998	0.000306789	0.0118922
ENSG00000006432	MAP3K9	-0.75552	0.000306985	0.0118922
ENSG00000014138	POLA2	-0.299465	0.000312438	0.0120771
ENSG00000204252	HLA-DOA	-0.656359	0.000314172	0.0121025
ENSG00000013573	DDX11	-0.586345	0.000314456	0.0121025
ENSG00000104147	OIP5	-0.715804	0.000315412	0.012113
ENSG00000143228	NUF2	-0.678285	0.000318309	0.0121802
ENSG00000183814	LIN9	-0.488034	0.00031853	0.0121802
ENSG00000143942	CHAC2	-0.788435	0.000321262	0.0122481
ENSG00000183765	CHEK2	-0.386327	0.000321747	0.0122481
ENSG00000258511	LINC02295	-0.970608	0.000322374	0.0122481
ENSG00000131747	TOP2A	-0.709835	0.00032341	0.0122613
ENSG00000081052	COL4A4	-1.01462	0.000325117	0.0122851
ENSG00000182481	KPNA2	-0.400674	0.00032593	0.0122851
ENSG00000137962	ARHGAP29	0.785579	0.000326111	0.0122851
ENSG00000106605	BLVRA	0.464205	0.000331032	0.0124441
ENSG00000186854	TRABD2A	-0.705436	0.000333056	0.0124938
ENSG00000111057	KRT18	-0.480196	0.000333996	0.0125027
ENSG00000183048	SLC25A10	-0.728996	0.000335104	0.0125178
ENSG00000017427	IGF1	-1.40209	0.000337376	0.0125763
ENSG00000163507	CIP2A	-0.534244	0.000341127	0.0126895
ENSG00000160193	WDR4	-0.329411	0.000342829	0.0127262
ENSG00000138160	KIF11	-0.732173	0.000346363	0.012791
ENSG00000149115	TNKS1BP1	-0.653784	0.000346692	0.012791
ENSG00000166851	PLK1	-0.771596	0.000346733	0.012791
ENSG00000153093	ACOXL	-1.12326	0.000348351	0.0128241
ENSG00000127586	CHTF18	-0.459737	0.000350287	0.0128509
ENSG00000123473	STIL	-0.650938	0.000350784	0.0128509
ENSG00000167775	CD320	-0.532412	0.000351247	0.0128509
ENSG00000141577	CEP131	-0.379522	0.000354888	0.0129574
ENSG00000151503	NCAPD3	-0.402028	0.000356286	0.0129576
ENSG00000116014	KISS1R	-0.763861	0.000356349	0.0129576
ENSG00000163938	GNL3	-0.361716	0.000357607	0.0129768
ENSG00000170486	KRT72	-1.09949	0.000358495	0.0129825
ENSG00000076604	TRAF4	-0.621828	0.000361589	0.0130376
ENSG00000211976	IGHV3-73	-1.61922	0.000361637	0.0130376
ENSG00000226025	LGALS17A	-1.07466	0.000362217	0.0130376
ENSG00000163053	SLC16A14	-1.24537	0.000370392	0.013272
ENSG00000079616	KIF22	-0.382054	0.000370709	0.013272
ENSG00000162298	SYVN1	-0.439469	0.000371775	0.013272
ENSG00000117602	RCAN3	-0.365065	0.000372418	0.013272
ENSG00000133424	LARGE1	-1.09006	0.000372907	0.013272
ENSG00000232613	LINC02576	-1.13664	0.000373206	0.013272
ENSG00000187118	CMC1	0.47587	0.000375405	0.0133235
ENSG00000076248	UNG	-0.495133	0.000377547	0.0133728
ENSG00000164087	POC1A	-0.488089	0.000382852	0.0135338
ENSG00000136052	SLC41A2	-0.822296	0.000385556	0.0135807
ENSG00000237276	ANO7L1	0.621883	0.000385708	0.0135807
ENSG00000174292	TNK1	-0.637039	0.00038648	0.013581
ENSG00000106628	POLD2	-0.350825	0.000388778	0.0136348
ENSG00000185339	TCN2	0.686645	0.00039447	0.0138035
ENSG00000162337	LRP5	-1.11491	0.000395141	0.0138035
ENSG00000027001	MIPEP	-0.320127	0.000396529	0.0138249
ENSG00000120915	EPHX2	-0.497578	0.000399883	0.0139145
ENSG00000211803	TRAV23DV6	-0.807684	0.000400778	0.0139184
ENSG00000132481	TRIM47	-0.593387	0.000404775	0.0140154
ENSG00000254395	IGHV4-55	-1.44631	0.000405146	0.0140154
ENSG00000126709	IFI6	0.990064	0.00040759	0.0140536
ENSG00000104290	FZD3	-0.473114	0.00040783	0.0140536
ENSG00000233916	ZDHHC20P1	1.01199	0.000411486	0.0141521
ENSG00000013375	PGM3	-0.348921	0.000412285	0.0141522
ENSG00000168273	SMIM4	0.476628	0.000413172	0.0141553
ENSG00000057657	PRDM1	-0.454181	0.000416551	0.0142436
ENSG00000111752	PHC1	-0.576656	0.000418088	0.0142688
ENSG00000211678	IGLJ3	-1.37973	0.000421979	0.0143739
ENSG00000211625	IGKV3D-20	-1.75103	0.000423105	0.0143848
ENSG00000154511	FAM69A	-0.456728	0.000430272	0.0146005
ENSG00000178921	PFAS	-0.401487	0.000432249	0.0146396
ENSG00000183742	MACC1	-0.917725	0.000439626	0.0148365
ENSG00000100462	PRMT5	-0.299227	0.000439731	0.0148365
ENSG00000004487	KDM1A	-0.33273	0.000441393	0.0148644
ENSG00000253818	IGLV1-41	-1.64893	0.000444649	0.0149457
ENSG00000123485	HJURP	-0.692192	0.000446155	0.0149681
ENSG00000144218	AFF3	-0.778125	0.000449528	0.0150513
ENSG00000177084	POLE	-0.433561	0.000450327	0.0150513
ENSG00000198554	WDHD1	-0.583495	0.000454169	0.0151512
ENSG00000183960	KCNH8	-1.16778	0.000458036	0.0152516
ENSG00000211664	IGLV2-18	-1.83	0.000462514	0.0153719
ENSG00000108984	MAP2K6	0.582027	0.000464557	0.015411
ENSG00000178035	IMPDH2	-0.267894	0.000468286	0.0154879
ENSG00000168421	RHOH	-0.394474	0.000468618	0.0154879
ENSG00000211935	IGHV1-3	-1.5997	0.000478516	0.0157857
ENSG00000203797	DDO	0.588256	0.000480721	0.0158291
ENSG00000271178	IGHV3OR16-13	-1.47587	0.000485082	0.0159432
ENSG00000112394	SLC16A10	-0.84707	0.000487142	0.0159651
ENSG00000244116	IGKV2-28	-1.40574	0.000487546	0.0159651
ENSG00000155304	HSPA13	-0.408926	0.000488525	0.0159678
ENSG00000231170	AC002451.1	0.657981	0.000493197	0.0160909
ENSG00000158869	FCER1G	0.474492	0.000500174	0.0162886
ENSG00000165905	LARGE2	-0.772936	0.000505389	0.0164284
ENSG00000103647	CORO2B	-1.16703	0.000506538	0.0164357
ENSG00000164136	IL15	0.37369	0.000512774	0.0166077
ENSG00000070950	RAD18	-0.260997	0.000514085	0.0166122
ENSG00000171657	GPR82	0.661297	0.000515212	0.0166122
ENSG00000183401	CCDC159	0.28765	0.000517089	0.0166122
ENSG00000274576	IGHV2-70	-2.22205	0.00051751	0.0166122
ENSG00000204390	HSPA1L	0.408214	0.000518941	0.0166122
ENSG00000081307	UBA5	-0.38007	0.000519374	0.0166122
ENSG00000112039	FANCE	-0.465508	0.000519454	0.0166122
ENSG00000161513	FDXR	0.364956	0.000522426	0.0166495
ENSG00000132357	CARD6	0.490846	0.000522491	0.0166495
ENSG00000131323	TRAF3	-0.326607	0.000526044	0.0167327
ENSG00000005513	SOX8	-0.912468	0.000535583	0.0170057
ENSG00000143771	CNIH4	0.439241	0.000540078	0.0170636
ENSG00000157827	FMNL2	0.590233	0.000541127	0.0170636
ENSG00000251023	AC114980.1	0.636184	0.00054128	0.0170636
ENSG00000167613	LAIR1	0.33357	0.000541652	0.0170636
ENSG00000136098	NEK3	0.280968	0.000542205	0.0170636
ENSG00000100147	CCDC134	-0.327026	0.00054383	0.0170845
ENSG00000135960	EDAR	-1.1333	0.000547424	0.0171671
ENSG00000166582	CENPV	-0.499251	0.000549158	0.0171912
ENSG00000117411	B4GALT2	-0.776538	0.000550319	0.0171972
ENSG00000078070	MCCC1	-0.242124	0.00055242	0.0172225
ENSG00000211650	IGLV5-45	-1.84542	0.000553066	0.0172225
ENSG00000072163	LIMS2	-0.676597	0.00055455	0.0172386
ENSG00000173198	CYSLTR1	0.397624	0.000561986	0.0174369
ENSG00000204394	VARS	-0.356444	0.000563402	0.0174369
ENSG00000133328	HRASLS2	-1.07653	0.000564018	0.0174369
ENSG00000270760	AD001527.1	0.678043	0.000564854	0.0174369
ENSG00000101898	MCTS2P	-0.552741	0.000567896	0.0174772
ENSG00000123352	SPATS2	-0.506384	0.000569057	0.0174772
ENSG00000179409	GEMIN4	-0.325205	0.000569106	0.0174772
ENSG00000159307	SCUBE1	-1.15016	0.000573985	0.0175966
ENSG00000100479	POLE2	-0.647252	0.000576071	0.0176301
ENSG00000211676	IGLJ2	-1.20421	0.000578784	0.0176828
ENSG00000164818	DNAAF5	-0.52598	0.000581371	0.0177313
ENSG00000132382	MYBBP1A	-0.440503	0.000583702	0.0177719
ENSG00000253239	IGLVI-70	-1.4324	0.000587415	0.0178544
ENSG00000145386	CCNA2	-0.746809	0.000591569	0.01795
ENSG00000166411	IDH3A	-0.283505	0.000594767	0.0179795
ENSG00000174944	P2RY14	-0.752654	0.000594932	0.0179795
ENSG00000066427	ATXN3	0.170812	0.000595574	0.0179795
ENSG00000125122	LRRC29	0.297704	0.000613395	0.018486
ENSG00000102265	TIMP1	0.469806	0.000617945	0.0185917
ENSG00000100596	SPTLC2	0.398591	0.000622368	0.0186633
ENSG00000135249	RINT1	-0.381006	0.000623137	0.0186633
ENSG00000104714	ERICH1	0.293904	0.000623476	0.0186633
ENSG00000231475	IGHV4-31	-1.6692	0.000625744	0.0186931
ENSG00000273576	AC009283.1	0.484077	0.000627881	0.0186931
ENSG00000112182	BACH2	-0.682145	0.000628565	0.0186931
ENSG00000228366	AL592437.1	-0.884206	0.000628674	0.0186931
ENSG00000162222	TTC9C	0.355855	0.000631891	0.0187574
ENSG00000213722	DDAH2	0.48578	0.000633048	0.0187604
ENSG00000171033	PKIA	-0.526136	0.000641417	0.0189483
ENSG00000130545	CRB3	-0.733695	0.000641519	0.0189483
ENSG00000156970	BUB1B	-0.835295	0.00064745	0.0190708
ENSG00000225523	IGKV6D-21	-1.73257	0.000647867	0.0190708
ENSG00000092853	CLSPN	-0.688598	0.00064943	0.0190708
ENSG00000123360	PDE1B	0.410372	0.000649959	0.0190708
ENSG00000162373	BEND5	-0.54391	0.000654241	0.0191648
ENSG00000132436	FIGNL1	-0.519528	0.000658771	0.0192658
ENSG00000151929	BAG3	-0.464598	0.00066449	0.0194012
ENSG00000224610	AC108879.1	-1.08246	0.000669762	0.0195009
ENSG00000151470	C4orf33	0.376531	0.000670101	0.0195009
ENSG00000197766	CFD	0.552225	0.000671499	0.0195097
ENSG00000240859	AC093627.4	0.422007	0.000685081	0.0198356
ENSG00000169252	ADRB2	0.405832	0.000685604	0.0198356
ENSG00000148773	MKI67	-0.66354	0.000686063	0.0198356
ENSG00000100206	DMC1	-1.05571	0.000687409	0.0198423
ENSG00000101966	XIAP	0.292325	0.000693328	0.0199806
ENSG00000106105	GARS	-0.247913	0.000696511	0.0200399
ENSG00000146425	DYNLT1	0.349276	0.000699553	0.0200946
ENSG00000089127	OAS1	0.665417	0.00070152	0.0200946
ENSG00000162078	ZG16B	0.725518	0.000701802	0.0200946
ENSG00000061656	SPAG4	-0.717175	0.000705907	0.0201796
ENSG00000154764	WNT7A	-0.93897	0.00070718	0.0201836
ENSG00000211890	IGHA2	-1.46074	0.000709553	0.0202188
ENSG00000128383	APOBEC3A	0.734177	0.000711477	0.0202412
ENSG00000254098	IGKV2-26	-1.09447	0.000721742	0.0205005
ENSG00000276775	IGHV4-4	-1.91418	0.000728863	0.0206697
ENSG00000227195	MIR663AHG	-1.02417	0.000733801	0.0207725
ENSG00000134909	ARHGAP32	-0.518332	0.000734824	0.0207725
ENSG00000154839	SKA1	-0.80569	0.000738773	0.020851
ENSG00000160683	CXCR5	-0.849888	0.000740361	0.0208627
ENSG00000180098	TRNAU1AP	0.206973	0.000741809	0.0208704
ENSG00000136986	DERL1	-0.2191	0.000747866	0.0209477
ENSG00000180543	TSPYL5	-0.715242	0.000748075	0.0209477
ENSG00000144231	POLR2D	-0.247814	0.000748091	0.0209477
ENSG00000145850	TIMD4	-0.749761	0.00076441	0.021371
ENSG00000160224	AIRE	-0.843172	0.000770737	0.0214708
ENSG00000186907	RTN4RL2	-0.73421	0.000771306	0.0214708
ENSG00000176890	TYMS	-0.856957	0.0007716	0.0214708
ENSG00000146410	MTFR2	-0.597357	0.000779669	0.0216388
ENSG00000142089	IFITM3	0.723662	0.000780074	0.0216388
ENSG00000164031	DNAJB14	0.263421	0.000786527	0.0217839
ENSG00000112033	PPARD	-0.332145	0.000789318	0.0218017
ENSG00000156510	HKDC1	-0.845669	0.000789622	0.0218017
ENSG00000176619	LMNB2	-0.493707	0.000791944	0.0218319
ENSG00000166562	SEC11C	-0.593753	0.000797685	0.0219347
ENSG00000163565	IFI16	0.461886	0.000798142	0.0219347
ENSG00000204642	HLA-F	0.304844	0.000800596	0.0219682
ENSG00000237943	PRKCQ-AS1	-0.40846	0.000802061	0.0219745
ENSG00000147231	CXorf57	-0.597637	0.000812656	0.0222305
ENSG00000284690	AC079325.2	0.761305	0.000814834	0.0222444
ENSG00000118985	ELL2	-0.559518	0.000816136	0.0222444
ENSG00000112877	CEP72	-0.567809	0.000817794	0.0222444
ENSG00000105246	EBI3	0.636419	0.000818168	0.0222444
ENSG00000277369	AC010654.1	0.406492	0.000819987	0.0222461
ENSG00000172548	NIPAL4	-0.75153	0.000822822	0.0222461
ENSG00000182580	EPHB3	-1.26601	0.000823358	0.0222461
ENSG00000261269	AC093278.2	0.843994	0.000824179	0.0222461
ENSG00000174307	PHLDA3	0.815251	0.000824977	0.0222461
ENSG00000124357	NAGK	0.369175	0.000826781	0.0222461
ENSG00000137266	SLC22A23	-0.563076	0.000826987	0.0222461
ENSG00000214198	TTC41P	-0.947285	0.000833173	0.0223523
ENSG00000111863	ADTRP	-0.767966	0.000833448	0.0223523
ENSG00000105974	CAV1	-1.11469	0.000836288	0.0223946
ENSG00000249115	HAUS5	-0.330408	0.000842559	0.0225286
ENSG00000025770	NCAPH2	-0.282125	0.000844201	0.0225386
ENSG00000109046	WSB1	0.377866	0.000848096	0.0225842
ENSG00000178226	PRSS36	0.355854	0.000849164	0.0225842
ENSG00000137812	KNL1	-0.636345	0.000850093	0.0225842
ENSG00000138092	CENPO	-0.436499	0.000853108	0.0225842
ENSG00000115705	TPO	-1.05112	0.000853291	0.0225842
ENSG00000134057	CCNB1	-0.710224	0.000853582	0.0225842
ENSG00000119979	FAM45A	0.300002	0.000854796	0.0225842
ENSG00000177272	KCNA3	-0.569063	0.000856905	0.0226063
ENSG00000204852	TCTN1	-0.42621	0.000859482	0.0226407
ENSG00000231705	AL451069.2	0.690485	0.000863203	0.0226751
ENSG00000214367	HAUS3	-0.433054	0.000863338	0.0226751
ENSG00000175106	TVP23C	-0.379925	0.000865199	0.0226904
ENSG00000079215	SLC1A3	0.717925	0.000868562	0.0227451
ENSG00000134709	HOOK1	-0.614463	0.000874288	0.0228358
ENSG00000144554	FANCD2	-0.373562	0.000874594	0.0228358
ENSG00000115677	HDLBP	-0.276489	0.000876614	0.0228543
ENSG00000112486	CCR6	-0.666964	0.000877874	0.0228543
ENSG00000135899	SP110	0.405915	0.000883689	0.022972
ENSG00000187608	ISG15	0.98348	0.000889023	0.0230714
ENSG00000141576	RNF157	-0.662969	0.000890107	0.0230714
ENSG00000211749	TRBV23-1	-0.712359	0.000894645	0.02312
ENSG00000172602	RND1	-0.834853	0.000895701	0.02312
ENSG00000170545	SMAGP	0.283683	0.000896897	0.02312
ENSG00000211696	TRGV8	0.748315	0.000897183	0.02312
ENSG00000119912	IDE	-0.315151	0.000902974	0.0232356
ENSG00000167900	TK1	-0.644408	0.000906492	0.0232924
ENSG00000253451	IGLV2-28	-1.82449	0.000908786	0.0233176
ENSG00000232021	LEF1-AS1	-0.830937	0.000911619	0.0233566
ENSG00000158169	FANCC	-0.424946	0.000915296	0.0234171
ENSG00000065308	TRAM2	-0.436859	0.000927368	0.0236918
ENSG00000130726	TRIM28	-0.421411	0.000931795	0.023757
ENSG00000204580	DDR1	-0.558823	0.000933182	0.023757
ENSG00000279602	AC109326.1	-0.700594	0.000933925	0.023757
ENSG00000160551	TAOK1	0.374342	0.000938161	0.0238306
ENSG00000144381	HSPD1	-0.339757	0.000942117	0.0238776
ENSG00000049656	CLPTM1L	-0.620318	0.000942697	0.0238776
ENSG00000196365	LONP1	-0.3188	0.000944371	0.023886
ENSG00000080561	MID2	-0.866985	0.000947452	0.0239096
ENSG00000118420	UBE3D	-0.367823	0.000948706	0.0239096
ENSG00000197093	GAL3ST4	-0.574865	0.000949337	0.0239096
ENSG00000249096	LINC02362	-0.658002	0.00095118	0.0239221
ENSG00000137959	IFI44L	1.15453	0.000954409	0.0239694
ENSG00000058056	USP13	-0.461663	0.000956501	0.0239881
ENSG00000116649	SRM	-0.624959	0.000963415	0.0241274
ENSG00000269378	ITGB1P1	-0.47386	0.000972546	0.0243219
ENSG00000182010	RTKN2	-0.684116	0.000984026	0.024515
ENSG00000072274	TFRC	-0.387279	0.000984667	0.024515
ENSG00000278709	NKILA	-0.763148	0.000985193	0.024515
ENSG00000152894	PTPRK	-0.80638	0.000985783	0.024515
ENSG00000082293	COL19A1	-1.09535	0.000990509	0.0245907
ENSG00000175287	PHYHD1	-0.742714	0.000991594	0.0245907
ENSG00000224041	IGKV3D-15	-1.42266	0.000995669	0.0246574
ENSG00000154319	FAM167A	-0.872913	0.00100189	0.024777
ENSG00000197785	ATAD3A	-0.390455	0.00100582	0.0248053
ENSG00000121621	KIF18A	-0.614465	0.00100583	0.0248053
ENSG00000135318	NT5E	-0.749799	0.0010103	0.0248811
ENSG00000123064	DDX54	-0.279723	0.00101512	0.0249652
ENSG00000143933	CALM2	0.354443	0.00102322	0.0251297
ENSG00000231682	LINC01891	-0.755638	0.00102662	0.0251784
ENSG00000073849	ST6GAL1	-0.393897	0.00103144	0.0252289
ENSG00000185745	IFIT1	1.16223	0.00103246	0.0252289
ENSG00000142583	SLC2A5	-0.743133	0.00103453	0.0252289
ENSG00000126759	CFP	0.439666	0.00103557	0.0252289
ENSG00000170312	CDK1	-0.724257	0.00103627	0.0252289
ENSG00000263961	C1orf186	-0.596195	0.00103719	0.0252289
ENSG00000204789	ZNF204P	-0.748355	0.00104713	0.0254264
ENSG00000165949	IFI27	1.59285	0.00104817	0.0254264
ENSG00000120334	CENPL	-0.357752	0.00104972	0.0254293
ENSG00000236200	KDM4A-AS1	-0.612064	0.00105642	0.0255302
ENSG00000275418	AC104971.4	-0.676449	0.00105676	0.0255302
ENSG00000123612	ACVR1C	-0.781073	0.00106004	0.0255746
ENSG00000140688	C16orf58	-0.316384	0.00106322	0.0256167
ENSG00000156345	CDK20	-0.567501	0.00108244	0.0260446
ENSG00000234261	AL138720.1	-0.732808	0.00108445	0.0260575
ENSG00000092621	PHGDH	-0.583881	0.00108802	0.026108
ENSG00000156509	FBXO43	-0.881793	0.00109416	0.0262201
ENSG00000123453	SARDH	-0.800667	0.00109634	0.0262368
ENSG00000197279	ZNF165	-0.713151	0.0011073	0.0264248
ENSG00000127074	RGS13	-1.09508	0.00110751	0.0264248
ENSG00000112812	PRSS16	-0.838815	0.00110935	0.0264248
ENSG00000172269	DPAGT1	-0.28632	0.00111014	0.0264248
ENSG00000128656	CHN1	-0.599058	0.0011128	0.0264528
ENSG00000137309	HMGA1	-0.470042	0.00111889	0.0265407
ENSG00000184613	NELL2	-0.762596	0.00111948	0.0265407
ENSG00000133106	EPSTI1	0.674199	0.00112287	0.0265854
ENSG00000068079	IFI35	0.520247	0.00113671	0.0268774
ENSG00000158715	SLC45A3	-0.770909	0.0011395	0.0269076
ENSG00000149054	ZNF215	-1.06039	0.0011466	0.0270393
ENSG00000179152	TCAIM	0.288044	0.00114849	0.027048
ENSG00000137807	KIF23	-0.547	0.00115171	0.0270881
ENSG00000089094	KDM2B	-0.370673	0.00115455	0.0271189
ENSG00000183624	HMCES	-0.285389	0.001159	0.027179
ENSG00000259768	AC004943.2	-0.715858	0.00116016	0.027179
ENSG00000165591	FAAH2	-0.767923	0.00117171	0.027399
ENSG00000067369	TP53BP1	-0.431436	0.00117263	0.027399
ENSG00000188807	TMEM201	-0.4829	0.00117691	0.027438
ENSG00000184575	XPOT	-0.308126	0.00117816	0.027438
ENSG00000236859	NIFK-AS1	0.252474	0.00117893	0.027438
ENSG00000168961	LGALS9	0.441297	0.00119146	0.0276622
ENSG00000196476	C20orf96	-0.398297	0.00119168	0.0276622
ENSG00000179029	TMEM107	0.259402	0.00119614	0.0276972
ENSG00000109084	TMEM97	-0.468467	0.0011963	0.0276972
ENSG00000238057	ZEB2-AS1	0.511304	0.00120383	0.0278352
ENSG00000233850	AC103563.7	-0.709343	0.0012256	0.0283018
ENSG00000203747	FCGR3A	0.454112	0.00122745	0.0283077
ENSG00000161800	RACGAP1	-0.412364	0.00124127	0.0285894
ENSG00000157456	CCNB2	-0.676102	0.00124569	0.0286338
ENSG00000177669	MBOAT4	-0.51502	0.00124897	0.0286338
ENSG00000281103	TRG-AS1	0.412445	0.00125009	0.0286338
ENSG00000225698	IGHV3-72	-1.6411	0.00125051	0.0286338
ENSG00000146281	PM20D2	-0.367881	0.00125245	0.0286338
ENSG00000146904	EPHA1	-0.401888	0.00125286	0.0286338
ENSG00000119977	TCTN3	-0.328468	0.00125489	0.0286433
ENSG00000101003	GINS1	-0.785235	0.00125928	0.0286925
ENSG00000157077	ZFYVE9	-0.521219	0.00126027	0.0286925
ENSG00000165304	MELK	-0.684528	0.0012641	0.0287185
ENSG00000237438	CECR7	-0.678828	0.00126464	0.0287185
ENSG00000145022	TCTA	0.261071	0.00126799	0.0287578
ENSG00000172113	NME6	0.234332	0.00127764	0.0289399
ENSG00000170653	ATF7	0.242809	0.00128008	0.0289511
ENSG00000118680	MYL12B	0.304115	0.0012814	0.0289511
ENSG00000058600	POLR3E	-0.306419	0.00128391	0.0289712
ENSG00000130707	ASS1	-1.16272	0.00129415	0.0291651
ENSG00000182107	TMEM30B	-0.787483	0.00130021	0.0292646
ENSG00000064989	CALCRL	0.545617	0.00130459	0.029326
ENSG00000235423	AC068768.1	-0.572742	0.00131615	0.0295486
ENSG00000059915	PSD	-0.492838	0.00132466	0.0296661
ENSG00000182670	TTC3	-0.284091	0.00132472	0.0296661
ENSG00000090989	EXOC1	0.232241	0.00133166	0.0297839
ENSG00000111788	AC009533.1	-0.553183	0.00133922	0.0298791
ENSG00000185527	PDE6G	0.37724	0.00133928	0.0298791
ENSG00000267547	AC060766.4	0.768253	0.00134405	0.0299481
ENSG00000089685	BIRC5	-0.719954	0.00135138	0.0300737
ENSG00000166965	RCCD1	-0.388618	0.00135315	0.0300756
ENSG00000122861	PLAU	-1.10996	0.00135786	0.0301407
ENSG00000167881	SRP68	-0.254674	0.00136037	0.0301407
ENSG00000168268	NT5DC2	-0.699199	0.00136227	0.0301407
ENSG00000255518	AC022239.3	-0.918663	0.00136287	0.0301407
ENSG00000139514	SLC7A1	-0.359746	0.00137162	0.0302965
ENSG00000095319	NUP188	-0.425863	0.00137508	0.0303354
ENSG00000152492	CCDC50	-0.33186	0.00138849	0.0305931
ENSG00000142227	EMP3	0.345605	0.00139334	0.0306622
ENSG00000255062	AP001318.3	0.515397	0.00140155	0.0308047
ENSG00000283602	AC116353.5	0.481319	0.00141716	0.0310677
ENSG00000023445	BIRC3	-0.423037	0.00141798	0.0310677
ENSG00000170264	FAM161A	-0.646203	0.00141876	0.0310677
ENSG00000077585	GPR137B	0.423604	0.00142113	0.0310812
ENSG00000121892	PDS5A	-0.285102	0.00142921	0.031193
ENSG00000256073	URB1-AS1	0.333745	0.00142975	0.031193
ENSG00000074696	HACD3	-0.307418	0.00144179	0.0313286
ENSG00000211961	IGHV1-45	-1.74003	0.00144239	0.0313286
ENSG00000163154	TNFAIP8L2	0.490955	0.00144312	0.0313286
ENSG00000149636	DSN1	-0.310542	0.00144526	0.0313286
ENSG00000116830	TTF2	-0.219427	0.00144647	0.0313286
ENSG00000160932	LY6E	0.736076	0.0014479	0.0313286
ENSG00000151849	CENPJ	-0.361738	0.0014483	0.0313286
ENSG00000273542	HIST1H4K	0.512757	0.00145249	0.0313812
ENSG00000113013	HSPA9	-0.221426	0.00145837	0.0314701
ENSG00000134291	TMEM106C	-0.370244	0.00146199	0.0314778
ENSG00000136699	SMPD4	-0.316237	0.00146227	0.0314778
ENSG00000088899	LZTS3	-0.735017	0.00147572	0.0317289
ENSG00000253540	FAM86HP	-0.659892	0.0014828	0.0318121
ENSG00000150782	IL18	0.472634	0.00148317	0.0318121
ENSG00000169435	RASSF6	-0.975907	0.00148958	0.0318711
ENSG00000163808	KIF15	-0.715248	0.00149003	0.0318711
ENSG00000100219	XBP1	-0.375359	0.0014913	0.0318711
ENSG00000218749	AL033519.1	1.0303	0.0014975	0.0319653
ENSG00000229151	AC233976.1	-0.696069	0.00149947	0.0319688
ENSG00000152495	CAMK4	-0.613324	0.00150257	0.0319966
ENSG00000116191	RALGPS2	-0.442698	0.00151212	0.0321146
ENSG00000197880	MDS2	-0.683654	0.00151281	0.0321146
ENSG00000235621	LINC00494	-0.944337	0.00151353	0.0321146
ENSG00000271605	MILR1	0.374225	0.00152651	0.0323515
ENSG00000176834	VSIG10	-0.469926	0.00153735	0.0325424
ENSG00000141956	PRDM15	-0.341634	0.00154994	0.0327413
ENSG00000127328	RAB3IP	-0.238608	0.00155043	0.0327413
ENSG00000085871	MGST2	0.368737	0.00155373	0.0327722
ENSG00000140743	CDR2	-0.381194	0.00156898	0.0330546
ENSG00000224220	AC104699.1	-0.80372	0.00157478	0.0331374
ENSG00000188596	CFAP54	-0.9482	0.00158037	0.0331508
ENSG00000087299	L2HGDH	-0.360525	0.00158098	0.0331508
ENSG00000121940	CLCC1	-0.316756	0.00158228	0.0331508
ENSG00000084774	CAD	-0.482929	0.00158287	0.0331508
ENSG00000119777	TMEM214	-0.289116	0.00158514	0.0331593
ENSG00000196420	S100A5	0.50607	0.00159649	0.0333574
ENSG00000220785	MTMR9LP	-0.641239	0.00160113	0.0334151
ENSG00000035499	DEPDC1B	-0.719824	0.00160716	0.0335016
ENSG00000065485	PDIA5	-0.389888	0.00161564	0.033639
ENSG00000162745	OLFML2B	0.642875	0.00161911	0.0336718
ENSG00000135476	ESPL1	-0.752313	0.00162337	0.0337209
ENSG00000108559	NUP88	-0.254547	0.00163817	0.0339888
ENSG00000090889	KIF4A	-0.718398	0.00164715	0.0340977
ENSG00000100916	BRMS1L	-0.282046	0.00164903	0.0340977
ENSG00000214193	SH3D21	-0.551598	0.00164918	0.0340977
ENSG00000241244	IGKV1D-16	-1.58055	0.00165867	0.0342541
ENSG00000164038	SLC9B2	-0.329759	0.00167137	0.0344764
ENSG00000134285	FKBP11	-0.525958	0.00169765	0.0349504
ENSG00000112378	PERP	-0.57124	0.00169828	0.0349504
ENSG00000005156	LIG3	-0.270464	0.00170356	0.0349887
ENSG00000211642	IGLV10-54	-1.74155	0.00170408	0.0349887
ENSG00000104921	FCER2	-0.737094	0.00171198	0.0351104
ENSG00000184588	PDE4B	-0.580269	0.00171849	0.0351967
ENSG00000117758	STX12	0.269998	0.00172015	0.0351967
ENSG00000166123	GPT2	-0.490206	0.00172512	0.0352579
ENSG00000251039	IGKV2D-40	-1.73097	0.00173855	0.0354386
ENSG00000248668	OXCT1-AS1	-0.764819	0.00173881	0.0354386
ENSG00000122965	RBM19	-0.271076	0.00173994	0.0354386
ENSG00000115468	EFHD1	-0.968904	0.00174333	0.035467
ENSG00000127022	CANX	-0.282017	0.00174704	0.0355019
ENSG00000214787	MS4A4E	0.420828	0.00177216	0.0359712
ENSG00000178562	CD28	-0.54364	0.00177548	0.0359975
ENSG00000133657	ATP13A3	-0.326598	0.00178009	0.0360499
ENSG00000239571	IGKV2D-30	-1.26343	0.00178793	0.0361674
ENSG00000175305	CCNE2	-0.475378	0.00179872	0.0363444
ENSG00000125731	SH2D3A	-0.460639	0.00180128	0.0363547
ENSG00000128059	PPAT	-0.459642	0.00180735	0.0364359
ENSG00000204482	LST1	0.48304	0.00180953	0.0364387
ENSG00000166002	SMCO4	0.421814	0.00181958	0.0365995
ENSG00000122043	LINC00544	-0.731392	0.00183397	0.0368473
ENSG00000126353	CCR7	-0.682148	0.001838	0.0368758
ENSG00000211639	IGLV4-60	-1.74592	0.0018399	0.0368758
ENSG00000165724	ZMYND19	-0.619301	0.00184161	0.0368758
ENSG00000213551	DNAJC9	-0.341864	0.00185045	0.037011
ENSG00000174996	KLC2	-0.337574	0.00185361	0.0370111
ENSG00000186638	KIF24	-0.802392	0.00185462	0.0370111
ENSG00000187741	FANCA	-0.282993	0.00185801	0.0370374
ENSG00000258366	RTEL1	-0.557686	0.00187907	0.0373924
ENSG00000135047	CTSL	0.532335	0.00188003	0.0373924
ENSG00000108798	ABI3	0.434568	0.00189076	0.0375639
ENSG00000154240	CEP112	-0.843935	0.00189598	0.0375657
ENSG00000130956	HABP4	-0.65051	0.00189609	0.0375657
ENSG00000143067	ZNF697	-0.602911	0.0018972	0.0375657
ENSG00000196557	CACNA1H	-0.757315	0.00190228	0.0376246
ENSG00000164484	TMEM200A	-0.772595	0.001906	0.0376562
ENSG00000240671	IGKV1-8	-1.41707	0.00190889	0.0376714
ENSG00000139737	SLAIN1	-0.572086	0.0019119	0.037689
ENSG00000099282	TSPAN15	-0.535707	0.00192789	0.0379622
ENSG00000159753	CARMIL2	-0.725362	0.00195333	0.0384205
ENSG00000101230	ISM1	-0.877016	0.00196319	0.0385457
ENSG00000269404	SPIB	-0.670031	0.00196403	0.0385457
ENSG00000235413	KRT18P63	-0.655959	0.00198267	0.0388686
ENSG00000103064	SLC7A6	-0.293731	0.00198539	0.0388791
ENSG00000086065	CHMP5	0.452807	0.00199543	0.038939
ENSG00000166197	NOLC1	-0.283195	0.00199604	0.038939
ENSG00000169857	AVEN	-0.579171	0.00199615	0.038939
ENSG00000002745	WNT16	-0.803415	0.00199721	0.038939
ENSG00000108641	B9D1	-0.699547	0.00200594	0.0390665
ENSG00000176928	GCNT4	-0.684415	0.00202676	0.0394287
ENSG00000055044	NOP58	-0.294366	0.00203748	0.0395813
ENSG00000173530	TNFRSF10D	-0.376866	0.00204127	0.0395813
ENSG00000112312	GMNN	-0.446816	0.00204128	0.0395813
ENSG00000153066	TXNDC11	-0.406484	0.00204656	0.0396404
ENSG00000274752	TRBV12-3	-0.690105	0.00205449	0.0396659
ENSG00000115306	SPTBN1	-0.398222	0.0020594	0.0396659
ENSG00000241294	IGKV2-24	-1.48848	0.00206135	0.0396659
ENSG00000132185	FCRLA	-0.813382	0.00206155	0.0396659
ENSG00000009830	POMT2	-0.383844	0.00206206	0.0396659
ENSG00000118197	DDX59	0.205569	0.00206323	0.0396659
ENSG00000171320	ESCO2	-0.704101	0.00206349	0.0396659
ENSG00000188352	FOCAD	-0.297672	0.00207784	0.0398627
ENSG00000115761	NOL10	-0.183454	0.00207821	0.0398627
ENSG00000263001	GTF2I	-0.315373	0.00209291	0.0400272
ENSG00000238197	PAXBP1-AS1	0.297747	0.00209291	0.0400272
ENSG00000075711	DLG1	-0.232767	0.00209354	0.0400272
ENSG00000103353	UBFD1	-0.299209	0.00209855	0.0400799
ENSG00000112782	CLIC5	-0.750953	0.00210235	0.0401093
ENSG00000177946	CENPBD1	0.333046	0.00212095	0.0403944
ENSG00000117215	PLA2G2D	-0.925194	0.00212184	0.0403944
ENSG00000188312	CENPP	-0.444453	0.00212589	0.0404284
ENSG00000075142	SRI	0.315453	0.00213077	0.0404459
ENSG00000277232	GTSE1-AS1	0.566746	0.00213458	0.0404459
ENSG00000168152	THAP9	-0.429414	0.0021351	0.0404459
ENSG00000272870	AC097534.2	0.580073	0.00213591	0.0404459
ENSG00000268001	CARD8-AS1	0.454247	0.00214027	0.0404853
ENSG00000136731	UGGT1	-0.246624	0.00214579	0.0405466
ENSG00000204472	AIF1	0.45086	0.00214962	0.0405757
ENSG00000184730	APOBR	0.475525	0.00215399	0.0406151
ENSG00000129625	REEP5	0.248738	0.00215672	0.0406235
ENSG00000105369	CD79A	-0.742973	0.00216296	0.0406506
ENSG00000249667	LINC01259	-0.683428	0.00216665	0.0406506
ENSG00000207475	SNORA80E	0.744188	0.00216694	0.0406506
ENSG00000226125	LINC01907	0.780438	0.0021673	0.0406506
ENSG00000067177	PHKA1	-1.18438	0.00217048	0.0406673
ENSG00000113319	RASGRF2	-0.518989	0.00217608	0.0407294
ENSG00000165617	DACT1	-0.863003	0.00220784	0.0412401
ENSG00000113048	MRPS27	-0.276845	0.00220801	0.0412401
ENSG00000162650	ATXN7L2	-0.275418	0.00221211	0.0412734
ENSG00000106415	GLCCI1	-0.430995	0.00222188	0.0413814
ENSG00000174669	SLC29A2	-0.458299	0.00222255	0.0413814
ENSG00000042286	AIFM2	-0.372558	0.00223318	0.0415357
ENSG00000006534	ALDH3B1	0.354875	0.00223988	0.0416169
ENSG00000232807	AL137186.2	0.405398	0.00224752	0.0417152
ENSG00000221890	NPTXR	-0.736048	0.00225363	0.0417851
ENSG00000166261	ZNF202	-0.408535	0.00225942	0.0418488
ENSG00000175294	CATSPER1	0.379194	0.00228119	0.0422079
ENSG00000151012	SLC7A11	-0.769222	0.00231146	0.0427235
ENSG00000186056	MATN1-AS1	-0.511275	0.00232957	0.0429581
ENSG00000258919	AL049836.1	0.846026	0.00233325	0.0429581
ENSG00000110944	IL23A	-0.446548	0.00233438	0.0429581
ENSG00000226950	DANCR	-0.445317	0.00233738	0.0429581
ENSG00000136573	BLK	-0.714557	0.00233851	0.0429581
ENSG00000152253	SPC25	-0.826597	0.00233865	0.0429581
ENSG00000214212	C19orf38	0.406641	0.00234161	0.0429682
ENSG00000197956	S100A6	0.452252	0.00234766	0.043006
ENSG00000108515	ENO3	-0.295783	0.00234875	0.043006
ENSG00000007312	CD79B	-0.447085	0.00235093	0.043006
ENSG00000204389	HSPA1A	0.629281	0.00235646	0.0430628
ENSG00000145050	MANF	-0.453476	0.00236136	0.0431081
ENSG00000146918	NCAPG2	-0.419447	0.00237069	0.0432341
ENSG00000125459	MSTO1	-0.360929	0.00238196	0.0433952
ENSG00000087087	SRRT	-0.240195	0.00238553	0.0434157
ENSG00000253755	IGHGP	-2.3391	0.00239609	0.0435633
ENSG00000137834	SMAD6	-1.04677	0.00240109	0.0435919
ENSG00000252103	RNU6-917P	0.435647	0.00240257	0.0435919
ENSG00000129484	PARP2	-0.309657	0.00243446	0.044062
ENSG00000188976	NOC2L	-0.253235	0.00243539	0.044062
ENSG00000181585	TMIE	-0.76781	0.00244159	0.044062
ENSG00000263417	GTSCR1	-0.829648	0.00244177	0.044062
ENSG00000143185	XCL2	0.613536	0.00244254	0.044062
ENSG00000165244	ZNF367	-0.517154	0.00244334	0.044062
ENSG00000155189	AGPAT5	-0.322752	0.00245004	0.0441379
ENSG00000115806	GORASP2	-0.273591	0.00246277	0.0443224
ENSG00000111247	RAD51AP1	-0.538258	0.00247324	0.0444658
ENSG00000196937	FAM3C	-0.397889	0.00249021	0.0447257
ENSG00000227036	LINC00511	-1.02957	0.00249526	0.0447711
ENSG00000132646	PCNA	-0.417683	0.00250014	0.0448012
ENSG00000174469	CNTNAP2	-1.26215	0.00250198	0.0448012
ENSG00000176273	SLC35G1	-0.367544	0.00250719	0.0448494
ENSG00000090520	DNAJB11	-0.323053	0.00252326	0.0450916
ENSG00000130303	BST2	0.432407	0.00253641	0.045281
ENSG00000211727	TRBV7-6	-0.677838	0.00254545	0.0453464
ENSG00000188130	MAPK12	-0.625118	0.00254933	0.0453464
ENSG00000281376	ABALON	0.615354	0.0025528	0.0453464
ENSG00000132016	C19orf57	-0.750962	0.00255426	0.0453464
ENSG00000099956	SMARCB1	-0.315826	0.00255431	0.0453464
ENSG00000175063	UBE2C	-0.60589	0.00255537	0.0453464
ENSG00000072858	SIDT1	-0.454466	0.00255839	0.0453546
ENSG00000079134	THOC1	-0.26311	0.00258292	0.0457439
ENSG00000182957	SPATA13	0.281137	0.00258989	0.0458217
ENSG00000137411	VARS2	-0.359433	0.00262017	0.0463114
ENSG00000182199	SHMT2	-0.322892	0.00262487	0.0463483
ENSG00000111012	CYP27B1	-0.770916	0.00264886	0.0467256
ENSG00000167850	CD300C	0.38503	0.00265504	0.0467425
ENSG00000163781	TOPBP1	-0.220505	0.00265508	0.0467425
ENSG00000140534	TICRR	-0.907055	0.00266032	0.0467885
ENSG00000011600	TYROBP	0.412726	0.00267366	0.0469503
ENSG00000166126	AMN	-0.776668	0.00267593	0.0469503
ENSG00000117724	CENPF	-0.61893	0.00267744	0.0469503
ENSG00000155962	CLIC2	0.50687	0.00268481	0.0469948
ENSG00000163600	ICOS	-0.509395	0.00268527	0.0469948
ENSG00000129173	E2F8	-0.789748	0.00270209	0.0472427
ENSG00000120533	ENY2	0.328942	0.00270639	0.047259
ENSG00000182985	CADM1	-0.585029	0.00270833	0.047259
ENSG00000170293	CMTM8	-0.566489	0.00271456	0.0473043
ENSG00000138101	DTNB	-0.219243	0.00271625	0.0473043
ENSG00000253633	AP002852.2	-0.907491	0.00272513	0.0474125
ENSG00000178307	TMEM11	0.258056	0.0027329	0.0475012
ENSG00000143344	RGL1	0.56908	0.00274544	0.0476656
ENSG00000175513	TSGA10IP	0.848398	0.00274772	0.0476656
ENSG00000132718	SYT11	0.313816	0.0027553	0.0477505
ENSG00000161996	WDR90	-0.452636	0.00276522	0.0478757
ENSG00000244620	AC246787.2	-0.831576	0.00280534	0.0485231
ENSG00000211652	IGLV7-43	-1.44205	0.00281473	0.0486249
ENSG00000185885	IFITM1	0.601571	0.0028167	0.0486249
ENSG00000112419	PHACTR2	0.29973	0.00282153	0.0486611
ENSG00000175567	UCP2	0.310858	0.00282488	0.0486718
ENSG00000155868	MED7	0.218	0.00283125	0.0487101
ENSG00000122420	PTGFR	1.04585	0.00283259	0.0487101
ENSG00000110848	CD69	-0.564837	0.00283572	0.0487169
ENSG00000163935	SFMBT1	-0.331531	0.00285655	0.0490274
ENSG00000116761	CTH	-0.64712	0.00286011	0.0490412
ENSG00000211611	IGKV6-21	-1.58049	0.00286641	0.0491017
ENSG00000137571	SLCO5A1	-0.803183	0.00287517	0.0492044
ENSG00000146083	RNF44	0.375709	0.00288186	0.0492715
ENSG00000230989	HSBP1	0.304838	0.00289995	0.0495331
ENSG00000179218	CALR	-0.303886	0.0029061	0.0495819
ENSG00000137752	CASP1	0.304032	0.00290838	0.0495819
ENSG00000169047	IRS1	-0.476642	0.00292572	0.0498297
ENSG00000123130	ACOT9	0.237894	0.00292958	0.0498349
ENSG00000175354	PTPN2	0.199095	0.00293163	0.0498349
ENSG00000241360	PDXP	-1.11131	0.00293539	0.0498511
