# Supplementary material for: Host-microbe multiomic profiling identifies distinct COVID-19 immune dysregulation in solid organ transplant recipients
Source: Nat Commun. 2025 Jan 10;16:586. doi: 10.1038/s41467-025-55823-z (PMC11723965; doi:10.1038/s41467-025-55823-z)
Supplement: Supplementary file 5 — Supplementary Data 3 [file 41467_2025_55823_MOESM5_ESM.xlsx]

## Sheet: Supp Data 3
ID	Description	setSize	NES	p.value	p.adjust	NES_vrld	p.adjust_vrld	core_enrichment	genes
R-HSA-156842	Eukaryotic Translation Elongation	88	-2.83626	1e-10	1.11706e-08	-3.07107	8.63182e-09	6193/6188/6147/6194/6138/6187/6217/6191/6129/116832/6171/6124/6137/11224/6125/6230/6203/6208/6223/6157/9045/6156/6141/23521/3921/6232/6161/6222/25873/6132/6143/6136/6134/6206/4736/51065/6233/6146/6144/6228/6158/6130/6209/6176/6189/6152/6201/6160/6205/6224/6169/6204/6181/6207/6165/6229/6159/6227/6167/6202/6235/6234/6139/6128/6164/6231/200916/6168/51121/6155/6135/9349/6218/6133/6170/6210/6173/6154/…	RPS5/RPS3/RPL23A/RPS6/RPL15/RPS2/RPS16/RPS4X/RPL7/RPL39L/RPL41/RPL4/RPL13/RPL35/RPL5/RPS25/RPS9/RPS14/RPS19/RPL27A/RPL14/RPL30/RPL18/RPL13A/RPSA/RPS27/RPL32/RPS18/RPL36/RPL8/RPL19/RPL12/RPL10/RPS12/RPL10A/RPS27L/RPS27A/RPL22/RPL21/RPS23/RPL28/RPL7A/RPS15/RPLP1/RPS3A/RPL24/RPS7/RPL31/RPS11/RPS20/RPL38/RPS10/RPLP2/RPS13/RPL35A/RPS24/RPL29/RPS21/RPL37/RPS8/RPS29/RPS28/RPL17/RPL6/RPL34/RPS26/RPL22L1/…
R-HSA-913531	Interferon Signaling	173	2.13346	1e-10	1.11706e-08	2.2648	8.63182e-09	7412/163351/3429/3458/3117/10107/2633/115362/3433/3437/115361/6772/3383/3659/91543/8651/8638/2209/3662/2634/7314/5335/24138/3434/9021/3120/4261/54739/4928/23321/23225/6773/10379/2635/23511/55706/9246/4940/6672/201626/4939/9631/10410/10346/2316/51191/817/103/5371/4684/3836/3133/3454/7316/4927/23165/3119/3717/1982/7726/6059/3669/4599/5770/7318/5724	VCAM1/GBP6/IFI27/IFNG/HLA-DQA1/TRIM10/GBP1/GBP5/IFIT2/IFIT3/GBP4/STAT1/ICAM1/IRF1/RSAD2/SOCS1/OASL/FCGR1A/IRF4/GBP2/UBB/PLCG1/IFIT5/IFIT1/SOCS3/HLA-DQB2/CIITA/XAF1/NUP98/TRIM2/NUP210/STAT2/IRF9/GBP3/NUP188/NDC1/UBE2L6/OAS3/SP100/PDE12/OAS2/NUP155/IFITM3/TRIM22/FLNA/HERC5/CAMK2D/ADAR/PML/NCAM1/KPNA1/HLA-E/IFNAR1/UBC/NUP88/NUP205/HLA-DQB1/JAK2/EIF4G2/TRIM26/ABCE1/ISG20/MX1/PTPN1/UBA7/PTAFR
R-HSA-611105	Respiratory electron transport	100	-2.37515	6.88448e-10	7.26313e-08	-2.52603	8.63182e-09	7386/93058/4712/6392/4728/51079/54539/55863/51241/285521/4710/55967/4706/4701/4540/9377/4512/27089/7388/4519/4717/1340/1329/1337/51300/1327/7381/4695/84987/9167/4716/4722/116228/374291/1345/4725/4709/10975/4711/1350/1349/4718/4726/29796/4513/91942/4694/4713/4536/4696/4697/4708/1351/4514/51103/126328/4715/4714/4535/4724/4702/4707/2109/4541/4538/4537	UQCRFS1/COQ10A/NDUFB6/SDHD/NDUFS8/NDUFA13/NDUFB11/TMEM126B/COX16/COX18/NDUFB4/NDUFA12/NDUFAB1/NDUFA7/MT-ND5/COX5A/MT-CO1/UQCRQ/UQCRH/MT-CYB/NDUFC1/COX6B1/COX5B/COX6A1/TIMMDC1/COX4I1/UQCRB/NDUFA2/COX14/COX7A2L/NDUFB10/NDUFS3/COX20/NDUFS7/COX6C/NDUFS5/NDUFB3/UQCR11/NDUFB5/COX7C/COX7B/NDUFC2/NDUFS6/UQCR10/MT-CO2/NDUFAF2/NDUFA1/NDUFB7/MT-ND2/NDUFA3/NDUFA4/NDUFB2/COX8A/MT-CO3/NDUFAF1/NDUFA11/NDUFB9/ND…
R-HSA-877300	Interferon gamma signaling	80	2.14297	5.75395e-08	4.96671e-06	2.23157	8.49186e-07	7412/163351/3458/3117/10107/2633/115362/115361/6772/3383/3659/8651/8638/2209/3662/2634/9021/3120/4261/23321/10379/2635/4940/6672/4939/10346/817/5371/4684/3133/3119/3717/7726	VCAM1/GBP6/IFNG/HLA-DQA1/TRIM10/GBP1/GBP5/GBP4/STAT1/ICAM1/IRF1/SOCS1/OASL/FCGR1A/IRF4/GBP2/SOCS3/HLA-DQB2/CIITA/TRIM2/IRF9/GBP3/OAS3/SP100/OAS2/TRIM22/CAMK2D/PML/NCAM1/HLA-E/HLA-DQB1/JAK2/TRIM26
R-HSA-6783783	Interleukin-10 signaling	38	2.07712	1.62845e-06	9.66385e-05	2.12437	0.000220969	3627/6347/2920/3383/3576/2919/3553/6348/1230/6349/5743/3557/1234/2208/6364/6351/6352/6774/3592/1435/3554/729230/5724/7297/3716/7850/941	CXCL10/CCL2/CXCL2/ICAM1/CXCL8/CXCL1/IL1B/CCL3/CCR1/CCL3L3/PTGS2/IL1RN/CCR5/FCER2/CCL20/CCL4/CCL5/STAT3/IL12A/CSF1/IL1R1/CCR2/PTAFR/TYK2/JAK1/IL1R2/CD80
R-HSA-6785807	Interleukin-4 and Interleukin-13 signaling	86	1.95384	4.02038e-06	0.00022455	2.00902	0.000103646	7412/6347/246/5008/356/6772/3383/3576/2162/3553/8651/4313/3662/2353/4312/1901/6095/5743/598/7184/6935/9021/51561/2208/2309/596/3688/4128/4170/2625/5295/6774/5292/3091/1026/3717/3592/604/7297/3718/2335/3716/3597/3726/3687/7133/4582/7040/7422	VCAM1/CCL2/ALOX15/OSM/FASLG/STAT1/ICAM1/CXCL8/F13A1/IL1B/SOCS1/MMP2/IRF4/FOS/MMP1/S1PR1/RORA/PTGS2/BCL2L1/HSP90B1/ZEB1/SOCS3/IL23A/FCER2/FOXO3/BCL2/ITGB1/MAOA/MCL1/GATA3/PIK3R1/STAT3/PIM1/HIF1A/CDKN1A/JAK2/IL12A/BCL6/TYK2/JAK3/FN1/JAK1/IL13RA1/JUNB/ITGAX/TNFRSF1B/MUC1/TGFB1/VEGFA
R-HSA-909733	Interferon alpha/beta signaling	56	2.02133	4.53009e-06	0.00024579	2.25038	4.88765e-06	3429/3433/3437/6772/3659/91543/8651/8638/3662/2634/24138/3434/9021/54739/6773/10379/4940/4939/10410/103/3133/3454/6059/3669/4599/5770/7297/25939/3716	IFI27/IFIT2/IFIT3/STAT1/IRF1/RSAD2/SOCS1/OASL/IRF4/GBP2/IFIT5/IFIT1/SOCS3/XAF1/STAT2/IRF9/OAS3/OAS2/IFITM3/ADAR/HLA-E/IFNAR1/ABCE1/ISG20/MX1/PTPN1/TYK2/SAMHD1/JAK1
R-HSA-76002	Platelet activation, signaling and aggregation	215	1.71096	1.14582e-05	0.000558046	1.67549	0.00281351	710/1950/3690/9162/10184/5627/22915/6403/3674/6678/80739/5054/2162/7225/94121/10257/5874/7450/3309/2149/5583/3710/23052/7424/10681/5473/5588/3959/9002/6714/3932/2814/3479/5747/135228/51206/6915/7414/2811/2790/1893/6414/5294/10672/747/1191/1521/2815/3920/2/5341/5028/2316/5295/2791/2153/64805/7094/8526/5336/87/10447/94235/23533/5155/10125/4352	SERPING1/EGF/ITGB3/DGKI/LHFPL2/PROS1/MMRN1/SELP/ITGA2B/SPARC/MPIG6B/SERPINE1/F13A1/TRPC6/SYTL4/ABCC4/RAB27B/VWF/HSPA5/F2R/PRKCH/ITPR3/ENDOD1/VEGFC/GNB5/PPBP/PRKCQ/LGALS3BP/F2RL3/SRC/LCK/GP5/IGF1/PTK2/CD109/GP6/TBXA2R/VCL/GP1BA/GNG10/ECM1/SELENOP/PIK3CG/GNA13/DAGLA/CLU/CTSW/GP9/LAMP2/A2M/PLEK/P2RY1/FLNA/PIK3R1/GNG11/F5/P2RY12/TLN1/DGKE/PLCG2/ACTN1/FAM3C/GNG8/PIK3R5/PDGFB/RASGRP1/MPL
R-HSA-388841	Costimulation by the CD28 family	64	1.9459	4.03951e-05	0.00187098	2.09876	0.000141226	29126/3117/80380/23308/29851/9402/151888/940/6714/3932/7525/3120/5133/916/919/9020/917/5519/5295/1493/5526/3119	CD274/HLA-DQA1/PDCD1LG2/ICOSLG/ICOS/GRAP2/BTLA/CD28/SRC/LCK/YES1/HLA-DQB2/PDCD1/CD3E/CD247/MAP3K14/CD3G/PPP2R1B/PIK3R1/CTLA4/PPP2R5B/HLA-DQB1
R-HSA-389948	PD-1 signaling	20	1.92965	0.00038424	0.0140321	2.00168	0.0102362	29126/3117/80380/3932/3120/5133/916/919/917/3119/915	CD274/HLA-DQA1/PDCD1LG2/LCK/HLA-DQB2/PDCD1/CD3E/CD247/CD3G/HLA-DQB1/CD3D
R-HSA-983170	Antigen Presentation: Folding, assembly and peptide loading of class I MHC	25	1.76197	0.0023907	0.0528522	1.83875	0.0470464	6890/3309/9632/10802/6892/811/821/51752/3133/2923/10427/6891/9871/10484/22872/3107/3135/3105	TAP1/HSPA5/SEC24C/SEC24A/TAPBP/CALR/CANX/ERAP1/HLA-E/PDIA3/SEC24B/TAP2/SEC24D/SEC23A/SEC31A/HLA-C/HLA-G/HLA-A
R-HSA-447115	Interleukin-12 family signaling	51	1.63883	0.00274052	0.0571896	1.65119	0.0792691	3458/759/6772/246778/4001/3595/51561/27250/3594/5721/6775/6774/821/4478/3936/3717/3592/3313/7297/3716/5034	IFNG/CA1/STAT1/IL27/LMNB1/IL12RB2/IL23A/PDCD4/IL12RB1/PSME2/STAT4/STAT3/CANX/MSN/LCP1/JAK2/IL12A/HSPA9/TYK2/JAK1/P4HB
R-HSA-156842	Eukaryotic Translation Elongation	88	-2.83626	1e-10	1.11706e-08	-3.07107	8.63182e-09	6193/6188/6147/6194/6138/6187/6217/6191/6129/116832/6171/6124/6137/11224/6125/6230/6203/6208/6223/6157/9045/6156/6141/23521/3921/6232/6161/6222/25873/6132/6143/6136/6134/6206/4736/51065/6233/6146/6144/6228/6158/6130/6209/6176/6189/6152/6201/6160/6205/6224/6169/6204/6181/6207/6165/6229/6159/6227/6167/6202/6235/6234/6139/6128/6164/6231/200916/6168/51121/6155/6135/9349/6218/6133/6170/6210/6173/6154/…	RPS5/RPS3/RPL23A/RPS6/RPL15/RPS2/RPS16/RPS4X/RPL7/RPL39L/RPL41/RPL4/RPL13/RPL35/RPL5/RPS25/RPS9/RPS14/RPS19/RPL27A/RPL14/RPL30/RPL18/RPL13A/RPSA/RPS27/RPL32/RPS18/RPL36/RPL8/RPL19/RPL12/RPL10/RPS12/RPL10A/RPS27L/RPS27A/RPL22/RPL21/RPS23/RPL28/RPL7A/RPS15/RPLP1/RPS3A/RPL24/RPS7/RPL31/RPS11/RPS20/RPL38/RPS10/RPLP2/RPS13/RPL35A/RPS24/RPL29/RPS21/RPL37/RPS8/RPS29/RPS28/RPL17/RPL6/RPL34/RPS26/RPL22L1/…
