# Supplementary material for: Host-microbe multiomic profiling identifies distinct COVID-19 immune dysregulation in solid organ transplant recipients
Source: Nat Commun. 2025 Jan 10;16:586. doi: 10.1038/s41467-025-55823-z (PMC11723965; doi:10.1038/s41467-025-55823-z)
Supplement: Supplementary file 6 — Supplementary Data 4 [file 41467_2025_55823_MOESM6_ESM.xlsx]

## Sheet: Supp Data 4
ID	Description	setSize	NES	p.value	p.adjust	NES_vrld	p.adjust_vrld	core_enrichment	genes
R-HSA-1280215	Cytokine Signaling in Immune system	737	1.71424	1e-10	3.21e-08	2.17075	1.926e-08	26525/7850/9173/2322/27179/4318/3559/3627/60401/8807/8809/8651/6347/6348/2357/1441/6364/3552/3557/5008/3117/4314/6349/3684/5155/2247/3553/2069/6283/1847/729230/11221/2209/51127/4843/941/6300/51332/3576/8744/8740/3383/2537/5623/7292/4792/3604/1230/3162/284/4940/2335/3662/56300/3127/3437/3433/5055/55540/3687/10538/4938/4684/948/1439/3434/51191/9365/115362/2633/8835/10434/6624/22808/3394/3055/6351/5…	IL36RN/IL1R2/IL1RL1/FLT3/IL36A/MMP9/IL2RA/CXCL10/EDA2R/IL18RAP/IL18R1/SOCS1/CCL2/CCL3/FPR1/CSF3R/CCL20/IL1A/IL1RN/OSM/HLA-DQA1/MMP3/CCL3L3/ITGAM/PDGFB/FGF2/IL1B/EREG/S100A12/DUSP5/CCR2/DUSP10/FCGR1A/TRIM17/NOS2/CD80/MAPK12/SPTBN5/CXCL8/TNFSF9/TNFSF14/ICAM1/IFI6/PSPN/TNFSF4/NFKBIA/TNFRSF9/CCR1/HMOX1/ANGPT1/OAS3/FN1/IRF4/IL36G/HLA-DRB5/IFIT3/IFIT2/SERPINB2/IL17RB/ITGAX/BATF/OAS1/NCAM1/CD36/CSF2RB/I…
R-HSA-168249	Innate Immune System	879	1.9467	1e-10	3.21e-08	2.50344	1.926e-08	84659/26253/2358/100049587/199675/338339/4318/2215/3577/1378/2204/6278/10562/3101/2268/6279/7130/8651/2357/727897/2219/6515/54210/222487/10321/5265/6280/58484/51806/53831/7077/6556/383/9447/3684/4311/160364/5646/8936/10622/4210/284266/5787/4317/3553/6283/394263/7321/51311/1515/729230/6036/2209/717/4843/26052/2212/6300/4680/5328/653361/51209/64581/4792/6518/963/9450/12/92610/7226/342510/64114/3083…	RNASE7/CLEC4E/FPR2/SIGLEC14/MCEMP1/CLEC4D/MMP9/FCGR3B/CXCR1/CR1/FCAR/S100A7/OLFM4/HK3/FGR/S100A8/TNFAIP6/SOCS1/FPR1/MUC5B/FCN1/SLC2A3/TREM1/ADGRG3/CRISP3/SERPINA1/S100A9/NLRC4/CALML5/GPR84/TIMP2/SLC11A1/ARG1/AIM2/ITGAM/MME/CLEC12A/PRSS3/WASF1/POLR3G/MEFV/SIGLEC15/PTPRB/MMP8/IL1B/S100A12/MUC21/UBE2D1/TLR8/CTSV/CCR2/RNASE2/FCGR1A/C2/NOS2/DNM3/FCGR2A/MAPK12/CEACAM6/PLAU/NCF1/RAB9B/CLEC7A/NFKBIA/SLC2…
R-HSA-449147	Signaling by Interleukins	394	1.91415	1e-10	3.21e-08	2.27565	1.926e-08	26525/7850/9173/27179/4318/3559/3627/8807/8809/8651/6347/6348/2357/1441/6364/3552/3557/5008/4314/6349/3684/2247/3553/6283/729230/4843/941/3576/3383/4792/1230/3162/2335/3662/56300/5055/55540/3687/10538/948/1439/8835/6624/3055/6351/5898/84868/1440/85480/3689/3563/2920/3569/7422/1026/5292/8357/7040/246330/7133/51135/3601/5696/8353/1435/3656/3561/7124/9655/3312/9049/5683/5783/466/53833/3606/2939/3934…	IL36RN/IL1R2/IL1RL1/IL36A/MMP9/IL2RA/CXCL10/IL18RAP/IL18R1/SOCS1/CCL2/CCL3/FPR1/CSF3R/CCL20/IL1A/IL1RN/OSM/MMP3/CCL3L3/ITGAM/FGF2/IL1B/S100A12/CCR2/NOS2/CD80/CXCL8/ICAM1/NFKBIA/CCR1/HMOX1/FN1/IRF4/IL36G/SERPINB2/IL17RB/ITGAX/BATF/CD36/CSF2RB/SOCS2/FSCN1/HCK/CCL4/RALA/HAVCR2/CSF3/TSLP/ITGB2/IL3RA/CXCL2/IL6/VEGFA/CDKN1A/PIM1/HIST1H3H/TGFB1/PELI3/TNFRSF1B/IRAK4/IL15RA/PSMB8/HIST1H3E/CSF1/IRAK2/IL2RG…
R-HSA-6798695	Neutrophil degranulation	435	2.09897	1e-10	3.21e-08	2.59829	1.926e-08	2358/100049587/199675/338339/4318/2215/3577/1378/2204/6278/10562/3101/2268/6279/7130/2357/2219/6515/222487/10321/5265/6280/51806/53831/7077/6556/383/3684/4311/160364/5646/5787/4317/6283/6036/2212/4680/5328/51209/6518/963/12/7226/64114/25797/634/3903/3687/2207/1508/948/719/3579/1536/8836/718/3240/5329/126014/8804/3689/1116/7097/978/3310/84658/5476/7133/140885/4033/10326/81619/11314/2760/23601/5141…	FPR2/SIGLEC14/MCEMP1/CLEC4D/MMP9/FCGR3B/CXCR1/CR1/FCAR/S100A7/OLFM4/HK3/FGR/S100A8/TNFAIP6/FPR1/FCN1/SLC2A3/ADGRG3/CRISP3/SERPINA1/S100A9/CALML5/GPR84/TIMP2/SLC11A1/ARG1/ITGAM/MME/CLEC12A/PRSS3/PTPRB/MMP8/S100A12/RNASE2/FCGR2A/CEACAM6/PLAU/RAB9B/SLC2A5/CD53/SERPINA3/TRPM2/TMBIM1/QPCT/CEACAM1/LAIR1/ITGAX/FCER1G/CTSB/CD36/C3AR1/CXCR2/CYBB/GGH/C3/HP/PLAUR/OSCAR/CREG1/ITGB2/CHI3L1/TLR2/CDA/HSPA6/ADGR…
R-HSA-6783783	Interleukin-10 signaling	40	2.30463	2.88434e-08	6.94404e-06	2.38733	4.27543e-06	7850/3627/6347/6348/2357/6364/3552/3557/6349/3553/729230/941/3576/3383/1230/6351/1440/2920/3569/7133/1435/7124/3606	IL1R2/CXCL10/CCL2/CCL3/FPR1/CCL20/IL1A/IL1RN/CCL3L3/IL1B/CCR2/CD80/CXCL8/ICAM1/CCR1/CCL4/CSF3/CXCL2/IL6/TNFRSF1B/CSF1/TNF/IL18
R-HSA-1474244	Extracellular matrix organization	219	1.87179	2.89986e-07	5.58513e-05	1.83135	5.05357e-05	5650/9510/1281/4318/22795/4321/6678/650/1308/4314/7077/4146/7837/3684/5155/2247/4317/6696/4316/1515/3910/55214/7042/84695/9509/4680/3383/7057/3696/9508/3912/634/2335/4017/284217/3371/3687/4684/1508/7092/1462/1294/5118/4811/1303/1296/7450/3679/3689/1285/140766/7040/649/3690/3914/2201/3678/1513/3681/59277/3673/1291/92291/8754	KLK7/ADAMTS1/COL3A1/MMP9/NID2/MMP12/SPARC/BMP2/COL17A1/MMP3/TIMP2/MATN1/PXDN/ITGAM/PDGFB/FGF2/MMP8/SPP1/MMP7/CTSV/LAMA4/P3H2/TGFB2/LOXL3/ADAMTS2/CEACAM6/ICAM1/THBS1/ITGB8/ADAMTS3/LAMB1/CEACAM1/FN1/LOXL2/LAMA1/TNC/ITGAX/NCAM1/CTSB/TLL1/VCAN/COL7A1/PCOLCE/NID1/COL12A1/COL8A2/VWF/ITGA7/ITGB2/COL4A3/ADAMTS14/TGFB1/BMP1/ITGB3/LAMB3/FBN2/ITGA5/CTSK/ITGAD/NTN4/ITGA2/COL6A1/CAPN13/ADAM9
R-HSA-446652	Interleukin-1 family signaling	128	1.91999	1.48184e-06	0.00020386	2.25759	7.19297e-08	26525/7850/9173/27179/8807/8809/3552/3557/3553/6283/4792/56300/246330/51135/5696/3656/5683/5783/3606/257397/5604/5684/8808/5782/54472/351/5685/5682/240/5691/5720/5701/8945/5688/1147/28512/29110/5599/8878/6500/5714/5771/4791	IL36RN/IL1R2/IL1RL1/IL36A/IL18RAP/IL18R1/IL1A/IL1RN/IL1B/S100A12/NFKBIA/IL36G/PELI3/IRAK4/PSMB8/IRAK2/PSMA2/PTPN13/IL18/TAB3/MAP2K1/PSMA3/IL1RL2/PTPN12/TOLLIP/APP/PSMA4/PSMA1/ALOX5/PSMB3/PSME1/PSMC2/BTRC/PSMA7/CHUK/NKIRAS1/TBK1/MAPK8/SQSTM1/SKP1/PSMD8/PTPN2/NFKB2
R-HSA-1280218	Adaptive Immune System	663	1.48224	2.08855e-06	0.000268169	1.8681	1.926e-08	1281/151888/8651/6614/54210/79865/1308/4360/3117/84617/27036/23308/11065/117157/7321/1515/9437/285852/2209/7220/26052/941/653361/3383/57823/55824/4792/10870/8905/3902/342510/30835/10235/3127/114907/24137/5493/3903/8722/29126/1508/948/1536/51191/3937/4277/718/6891/4008/146722/8139/29127/80380/126014/9493/3708/3689/2533/26267/6890/11027/9246/3824/7097/51130/118788/5476/10293/57761/5696/11314/23327/…	COL3A1/BTLA/SOCS1/SIGLEC1/TREM1/TREML2/COL17A1/MRC1/HLA-DQA1/TUBB6/SIGLEC7/ICOSLG/UBE2C/SH2D1B/UBE2D1/CTSV/NCR1/TREML4/FCGR1A/TRPC1/DNM3/CD80/NCF1/ICAM1/SLAMF7/PAG1/NFKBIA/HCST/AP1S2/LAG3/CD300E/CD209/RASGRP2/HLA-DRB5/FBXO32/KIF4A/PPL/LAIR1/CTSF/CD274/CTSB/CD36/CYBB/HERC5/LCP2/MICB/C3/TAP2/LMO7/CD300LF/GAN/RACGAP1/PDCD1LG2/OSCAR/KIF23/ITPR1/ITGB2/FYB1/FBXO10/TAP1/LILRA2/UBE2L6/KLRD1/TLR2/ASB3/PIK…
R-HSA-211859	Biological oxidations	155	-1.71913	5.68322e-05	0.00608104	-1.57991	0.0183559	10327/66002/4051/9446/2729/84532/10858/6256/4835/7364/1594/218/670/219/29104/13/64174/347734/27306/2946/2686/494143/2941/124975/9060/126/84836/1558/1727/2232/2948/4143/54577/2678/54996/50512/2938/22977/131/340665/56603/26873/6817/1562/54575/874/54578/1066/6799/130/54600/4129/23491/134147/54658/2940/54657/5742/1592/29785/54576/2944	AKR1A1/CYP4F12/CYP4F3/GSTO1/GCLC/ACSS1/CYP46A1/RXRA/NQO2/UGT2B7/CYP27B1/ALDH3A1/BPHL/ALDH1B1/N6AMT1/AADAC/DPEP2/SLC35B2/HPGDS/GSTM2/GGT7/CHAC2/GSTA4/GGT6/PAPSS2/ADH1C/ABHD14B/CYP2C8/CYB5R3/FDXR/GSTM4/MAT1A/UGT1A7/GGT1/MARC2/PODXL2/GSTA1/AKR7A3/ADH7/CYP26C1/CYP26B1/OPLAH/SULT1A1/CYP2C18/UGT1A10/CBR3/UGT1A6/CES1/SULT1A2/ADH6/UGT1A9/MAOB/CES3/CMBL/UGT1A1/GSTA3/UGT1A4/PTGS1/CYP26A1/CYP2S1/UGT1A8/GSTM1
R-HSA-909733	Interferon alpha/beta signaling	56	1.87931	0.000250846	0.0219604	2.55851	1.926e-08	8651/2537/4940/3662/3437/3433/4938/3434/3394/24138/11274/4939/5696/10581/3659/2634/54739/684/91543/9021/6772/3429/6773/4599	SOCS1/IFI6/OAS3/IRF4/IFIT3/IFIT2/OAS1/IFIT1/IRF8/IFIT5/USP18/OAS2/PSMB8/IFITM2/IRF1/GBP2/XAF1/BST2/RSAD2/SOCS3/STAT1/IFI27/STAT2/MX1
R-HSA-1222556	ROS and RNS production in phagocytes	30	1.88456	0.000638799	0.0439403	2.15985	0.000322432	6556/4843/653361/1536/526/245972/525/4688/4689/245973/5880/51606/51382/8992/9296/523/9550/529	SLC11A1/NOS2/NCF1/CYBB/ATP6V1B2/ATP6V0D2/ATP6V1B1/NCF2/NCF4/ATP6V1C2/RAC2/ATP6V1H/ATP6V1D/ATP6V0E1/ATP6V1F/ATP6V1A/ATP6V1G1/ATP6V1E1
R-HSA-1640170	Cell Cycle	644	1.29729	0.00154824	0.0918987	1.27835	0.0295833	80119/84057/79075/220134/84617/157570/8343/11065/1870/7321/8900/5888/9700/440145/898/8318/8360/22822/8348/79959/9837/9232/1030/51053/983/23175/675/9156/151246/1029/9493/348235/51659/54908/6119/79682/8334/1026/5557/5558/8357/7532/55388/4173/57082/5440/5424/5696/8353/348995/3014/23224/140609/7514/9134/23397/5683/10592/1027/10733/8365/23594/6118/55166/10388/3018/55839/1719/1869/5111/699/9662/10142/1…	PIF1/MND1/DSCC1/SKA1/TUBB6/ESCO2/HIST1H2BF/UBE2C/E2F2/UBE2D1/CCNA1/RAD51/ESPL1/MZT1/CCNE1/CDC45/HIST1H4D/PHLDA1/HIST1H2BO/CEP76/GINS1/PTTG1/CDKN2B/GMNN/CDK1/LPIN1/BRCA2/EXO1/SGO2/CDKN2A/KIF23/SKA2/GINS2/SPDL1/RPA3/CENPU/HIST1H2AC/CDKN1A/PRIM1/PRIM2/HIST1H3H/YWHAG/MCM10/MCM4/KNL1/POLR2K/POLD1/PSMB8/HIST1H3E/NUP43/H2AFX/SYNE2/NEK7/XPO1/CCNE2/NCAPH/PSMA2/SMC2/CDKN1B/PLK4/HIST1H4H/ORC6/RPA2/CENPQ/SYC…
R-HSA-446728	Cell junction organization	72	1.76362	0.000466699	0.0345716	1.58441	0.0497507	3861/1009/1308/1006/3852/55679/84612/23705/1000/9080/53842/137075/3914/2316/54549/5010/24146/25945/64398/4301/64403/3688/667/1364/81607/1365/9069	KRT14/CDH11/COL17A1/CDH8/KRT5/LIMS2/PARD6B/CADM1/CDH2/CLDN9/CLDN22/CLDN23/LAMB3/FLNA/SDK2/CLDN11/CLDN15/NECTIN3/MPP5/AFDN/CDH24/ITGB1/DST/CLDN4/NECTIN4/CLDN3/CLDN12
R-HSA-6785807	Interleukin-4 and Interleukin-13 signaling	91	2.08833	6.34296e-07	0.000101805	2.59602	1.926e-08	4318/8651/6347/3552/5008/4314/3684/2247/3553/4843/3576/3383/3162/2335/3662/3687/10538/948/6624/3689/3569/7422/1026/5292/7040/7133/3561/7124/9655/3312/3606/3934/9021/6772/2625/2308/595/3688	MMP9/SOCS1/CCL2/IL1A/OSM/MMP3/ITGAM/FGF2/IL1B/NOS2/CXCL8/ICAM1/HMOX1/FN1/IRF4/ITGAX/BATF/CD36/FSCN1/ITGB2/IL6/VEGFA/CDKN1A/PIM1/TGFB1/TNFRSF1B/IL2RG/TNF/SOCS5/HSPA8/IL18/LCN2/SOCS3/STAT1/GATA3/FOXO1/CCND1/ITGB1
R-HSA-198933	Immunoregulatory interactions between a Lymphoid and a non-Lymphoid cell	94	1.75201	0.000267145	0.0223705	2.28673	1.35922e-06	1281/6614/54210/79865/1308/27036/117157/9437/285852/2209/3383/57823/10870/342510/3903/4277/718/146722/126014/3689/11027/3824/11314/11006/89790/114836/10219/2214/3695/933/926/353514/3384/3688/2213/11024/945/131450/567/975/1278/10859/29121/930/7087/3135/1525/54209/51348/3820/3133/56654/3676/7305	COL3A1/SIGLEC1/TREM1/TREML2/COL17A1/SIGLEC7/SH2D1B/NCR1/TREML4/FCGR1A/ICAM1/SLAMF7/HCST/CD300E/LAIR1/MICB/C3/CD300LF/OSCAR/ITGB2/LILRA2/KLRD1/CD300A/LILRB4/SIGLEC10/SLAMF6/KLRG1/FCGR3A/ITGB7/CD22/CD8B/LILRA5/ICAM2/ITGB1/FCGR2B/LILRA1/CD33/CD200R1/B2M/CD81/COL1A2/LILRB1/CLEC2D/CD19/ICAM5/HLA-G/CXADR/TREM2/KLRF1/KLRB1/HLA-E/NPDC1/ITGA4/TYROBP
R-HSA-168898	Toll-like Receptor Cascades	141	1.58531	0.000671368	0.0445881	2.21984	4.85821e-08	6279/8651/6280/3684/6283/7321/51311/1515/26052/4792/9450/1508/948/51284/3689/81793/7097/246330/4064/51135/3656/1513/466/5641/257397/929/7099/1849/148022/1845/5604	S100A8/SOCS1/S100A9/ITGAM/S100A12/UBE2D1/TLR8/CTSV/DNM3/NFKBIA/LY86/CTSB/CD36/TLR7/ITGB2/TLR10/TLR2/PELI3/CD180/IRAK4/IRAK2/CTSK/ATF1/LGMN/TAB3/CD14/TLR4/DUSP7/TICAM1/DUSP3/MAP2K1
R-HSA-156588	Glucuronidation	12	-1.94656	0.000334962	0.0268807	-1.95088	0.00877441	54577/54575/54578/54600/54658/54657/54576	UGT1A7/UGT1A10/UGT1A6/UGT1A9/UGT1A1/UGT1A4/UGT1A8
