# Supplementary material for: Host-microbe multiomic profiling identifies distinct COVID-19 immune dysregulation in solid organ transplant recipients
Source: Nat Commun. 2025 Jan 10;16:586. doi: 10.1038/s41467-025-55823-z (PMC11723965; doi:10.1038/s41467-025-55823-z)
Supplement: Supplementary file 7 — Supplementary Data 5 [file 41467_2025_55823_MOESM7_ESM.xlsx]

## Sheet: Supp Data 5
ID	Description	setSize	NES	p.value	p.adjust	NES_vrld	p.adjust_vrld	core_enrichment	genes
R-HSA-913531	Interferon Signaling	174	2.11839	3.11505e-10	3.37995e-08	2.04298	4.07288e-07	10410/2635/91543/3437/2633/4502/567/960/4599/115362/3133/103/3122/117854/4600/4939/10346/115361/3434/3127/6737/5610/8519/9246/85363/54739/24138/23586/6772/3117/3838/163351/4940/3113/3123/3837/3106/6041/2316/3105/3669/10475/6233/5371/3433/6672/8638/4684/3135/317649/3115/684/4928/7706/4938/51191/10379/3134/3841/3460/3107/25939/5580/23279/7311/3430/3660/2634/4261/9636/3429/3716/7341/3717/3117/7316/5…	IFITM3/GBP3/RSAD2/IFIT3/GBP1/MT2A/B2M/CD44/MX1/GBP5/HLA-E/ADAR/HLA-DRA/TRIM6/MX2/OAS2/TRIM22/GBP4/IFIT1/HLA-DRB5/TRIM21/EIF2AK2/IFITM1/UBE2L6/TRIM5/XAF1/IFIT5/DDX58/STAT1/HLA-DQA1/KPNA2/GBP6/OAS3/HLA-DPA1/HLA-DRB1/KPNB1/HLA-B/RNASEL/FLNA/HLA-A/ISG20/TRIM38/RPS27A/PML/IFIT2/SP100/OASL/NCAM1/HLA-G/EIF4E3/HLA-DPB1/BST2/NUP98/TRIM25/OAS1/HERC5/IRF9/HLA-F/KPNA5/IFNGR2/HLA-C/SAMHD1/PRKCD/NUP160/UBA52/I…
R-HSA-1640170	Cell Cycle	644	1.74085	3.15719e-10	3.37995e-08	1.76838	9.635e-09	11200/55388/983/4609/8359/4085/157570/203068/8318/22974/4175/5720/3837/4171/994/8900/7083/5347/11130/9493/5438/95681/8607/1063/6233/4001/63967/220134/7153/147841/10733/55055/7534/1062/1870/5985/675/4683/4928/8339/8345/79075/8366/8468/11065/5685/8655/11064/54069/22919/5111/1163/119504/890/10783/4957/5716/23345/5861/5699/8294/10000/26277/701/23279/9232/55835/7311/8368/5698/3020/6232/472/5721/4173/7…	TYMS/HIST1H2BM/CDC25A/HJURP/FOXM1/CETN2/ORC1/NDC80/SGO1/RRM2/MYBL2/HIST1H3I/CENPW/SKP2/RFC3/CDC20/AURKB/KIF2C/CENPI/NCAPH/HIST1H2BL/KIF20A/HIST1H3F/NCAPG/PKMYT1/TUBA1A/CCNE2/HMMR/CENPS/HIST1H2BI/PIF1/DYNC1I1/RAD51/EXO1/LIN37/CDC6/SFN/GTSE1/BLM/RAD51C/GINS4/STAG3/CCND2/TUBA1C/POLE4/LYN/CDCA5/HIST1H3G/H3F3B/MSH5/RMI2/HIST1H3A/CHMP4A/GINS2/CCNB1/BIRC5/AJUBA/CENPN/CDC7/NUF2/HIST1H4F/CHEK2/MCM10/CDK1/…
R-HSA-72766	Translation	287	1.80436	2.43182e-07	1.80235e-05	1.82804	9.76902e-06	6224/6234/1968/26589/25973/6154/6231/11224/6128/6203/6156/51386/6191/6202/6130/6205/6210/6129/6188/6124/6143/8668/6146/7453/10240/6135/51649/11222/2107/10352/6166/6187/9255/6228/6189/6147/6158/6132/6167/6217/6122/29104/3735/6139/8664/6165/6230/7311/6160/6232/25873/6133/6206/6201/6144/26986/6138/6181/9349/65003/1938/63875/6734/6208/1978/9045/23521/7965/51253/6218/54516/124454/2617/3035/6204/5018/6…	MRPL53/GSPT2/RPL39L/SEC61G/RPS6/RPS24/MRPS24/SSR1/RPL32/RPL29/RPL24/RPL10A/MRPL48/RPS18/RPL5/RPL10/RPL27/RPL12/MRPL40/EEF1A1/RPS13/TSFM/RPS27A/SSR2/RPL34/RPS20/RPS28/EIF2S3/MRPL46/PARS2/RPL26/RPS26/RPL35/RPL6/RPS9/RPL30/EIF3L/RPS4X/RPS8/RPL7A/RPS11/RPS15A/RPL7/RPS3/RPL4/RPL19/EIF3I/RPL22/WARS/MRPS31/RPL11/MRPS23/MRPL3/ETF1/WARS2/RPL36AL/RPS2/AIMP1/RPS23/RPS3A/RPL23A/RPL28/RPL8/RPL37/RPS16/RPL3/N6…
R-HSA-202403	TCR signaling	111	1.9611	5.57108e-06	0.000335483	1.9246	0.000185412	916/9402/917/915/5588/3702/3932/7535/3122/3127/3117/3113/5720/3123/9398/6233/5058/919/5728/3115/5685/4790/5716/5699/5062/23118/7311/8915/5698/5721/8767/5700/5689/5795/5788/5710/5719/3117/7316/9491/5970/10197/3120/5715/5690/7314/3635/5691/920/8454/5692/5708/4690/7334/7322/5713/5686/5711/5694/5684/5693/5702/7189	CD3E/GRAP2/CD3G/CD3D/PRKCQ/ITK/LCK/ZAP70/HLA-DRA/HLA-DRB5/HLA-DQA1/HLA-DPA1/PSME1/HLA-DRB1/CD101/RPS27A/PAK1/CD247/PTEN/HLA-DPB1/PSMA4/NFKB1/PSMD10/PSMB10/PAK2/TAB2/UBA52/BCL10/PSMB9/PSME2/RIPK2/PSMC1/PSMB1/PTPRJ/PTPRC/PSMD4/PSMD13/HLA-DQA1/UBC/PSMF1/RELA/PSME3/HLA-DQB2/PSMD9/PSMB2/UBB/INPP5D/PSMB3/CD4/CUL1/PSMB4/PSMD2/NCK1/UBE2N/UBE2D2/PSMD7/PSMA5/PSMD5/PSMB6/PSMA3/PSMB5/PSMC3/TRAF6
R-HSA-909733	Interferon alpha/beta signaling	56	2.06508	6.14149e-06	0.000358626	1.93726	0.0057821	10410/91543/3437/4599/3133/103/4600/4939/3434/8519/54739/24138/6772/4940/3106/6041/3105/3669/3433/8638/3135/684/4938/10379/3134/3107/25939/3430/3660/2634/9636/3429/3716	IFITM3/RSAD2/IFIT3/MX1/HLA-E/ADAR/MX2/OAS2/IFIT1/IFITM1/XAF1/IFIT5/STAT1/OAS3/HLA-B/RNASEL/HLA-A/ISG20/IFIT2/OASL/HLA-G/BST2/OAS1/IRF9/HLA-F/HLA-C/SAMHD1/IFI35/IRF2/GBP2/ISG15/IFI27/JAK1
R-HSA-877300	Interferon gamma signaling	80	2.00743	1.49013e-05	0.000739545	1.88979	0.00178093	2635/2633/4502/567/960/115362/3133/3122/117854/4939/10346/115361/3127/6737/85363/6772/3117/163351/4940/3113/3123/3106/3105/10475/5371/6672/8638/4684/3135/3115/7706/4938/10379/3134/3460/3107/5580/3660/2634/4261/3716/7341/3717/3117/5770/3459/3120	GBP3/GBP1/MT2A/B2M/CD44/GBP5/HLA-E/HLA-DRA/TRIM6/OAS2/TRIM22/GBP4/HLA-DRB5/TRIM21/TRIM5/STAT1/HLA-DQA1/GBP6/OAS3/HLA-DPA1/HLA-DRB1/HLA-B/HLA-A/TRIM38/PML/SP100/OASL/NCAM1/HLA-G/HLA-DPB1/TRIM25/OAS1/IRF9/HLA-F/IFNGR2/HLA-C/PRKCD/IRF2/GBP2/CIITA/JAK1/SUMO1/JAK2/HLA-DQA1/PTPN1/IFNGR1/HLA-DQB2
R-HSA-6798695	Neutrophil degranulation	437	-1.48148	8.38891e-05	0.00310874	-1.48573	0.0057821	1118/7077/7133/3689/79930/2171/8836/3903/23601/3310/3579/2212/3101/23526/5806/4311/4680/10326/718/3934/126014/6515/64386/5646/12/84658/2268/948/10562/11240/5329/7226/3687/22918/1378/10321/6036/5004/51806/3684/338339/2357/6556/978/7130/222487/2219/53831/4317/2215/6278/3577/2204/199675/4318/2358/100049587	CHIT1/TIMP2/TNFRSF1B/ITGB2/DOK3/FABP5/GGH/LAIR1/CLEC5A/HSPA6/CXCR2/FCGR2A/HK3/ARHGAP45/PTX3/MME/CEACAM6/SIRPB1/C3/LCN2/OSCAR/SLC2A3/MMP25/PRSS3/SERPINA3/ADGRE3/FGR/CD36/OLFM4/PADI2/PLAUR/TRPM2/ITGAX/CD93/CR1/CRISP3/RNASE2/ORM1/CALML5/ITGAM/CLEC4D/FPR1/SLC11A1/CDA/TNFAIP6/ADGRG3/FCN1/GPR84/MMP8/FCGR3B/S100A7/CXCR1/FCAR/MCEMP1/MMP9/FPR2/SIGLEC14
R-HSA-9014826	Interleukin-36 pathway	5	-1.84705	0.000140294	0.0049154	-1.80952	0.0190318	56300/27179/26525	IL36G/IL36A/IL36RN
R-HSA-69306	DNA Replication	125	1.73415	0.000250202	0.00803564	1.67275	0.0057821	4998/6502/5983/9134/990/84296/56655/51659/8317/55388/8318/4175/5720/4171/8900/6233/1870/5985/11065/5685/5111/119504/890/5716/5699/7311/5698/5721/4173/4172/5700/5689/2237/5427/5710/54107/5719/7316/9491/29945/10197/5715/5690/5984/5425/7314/5691/1871/6118/8454/64682/5692/23594/996/5708/5713/5686/1017/5000/5711/5694/5684/5693/5702/10714/6119/5707/5701/5422/5695/1869	ORC1/SKP2/RFC3/CCNE2/CDC6/GINS4/POLE4/GINS2/CDC7/MCM10/CDC45/MCM6/PSME1/MCM2/CCNA1/RPS27A/E2F2/RFC5/UBE2C/PSMA4/PCNA/ANAPC16/CCNA2/PSMD10/PSMB10/UBA52/PSMB9/PSME2/MCM4/MCM3/PSMC1/PSMB1/FEN1/POLE2/PSMD4/POLE3/PSMD13/UBC/PSMF1/ANAPC4/PSME3/PSMD9/PSMB2/RFC4/POLD2/UBB/PSMB3/E2F3/RPA2/CUL1/ANAPC1/PSMB4/ORC6/CDC27/PSMD2/PSMD7/PSMA5/CDK2/ORC4/PSMD5/PSMB6/PSMA3/PSMB5/PSMC3/POLD3/RPA3/PSMD1/PSMC2/POLA1/PS…
R-HSA-2262752	Cellular responses to stress	536	1.39865	0.000335905	0.00886696	1.45856	0.00383531	8/829/6130/6205/6210/6129/4928/6188/6124/8339/6143/8345/8366/6146/11065/5608/5685/8655/6135/4790/2877/6166/6187/119504/890/5716/10935/6228/6189/6147/6158/6132/5699/6167/8294/6217/6122/10542/26277/6139/6165/23279/6230/7311/8368/6160/5698/3020/6232/472/830/5721/25873/7531/6133/3012/8343/7014/6206/8348/8649/192670/5700/6201/5689/6144/6138/6181/9349/8356/7277/832/8091/6208/528/2114/5710/5594/9045/103…	HIST1H2BM/HIST1H1A/HIST1H3I/HIST1H2BL/HIST1H3F/TUBA1A/CCNE2/TNIK/HIST1H2BI/HIST1H1B/DYNC1I1/NOX5/TUBA1C/HIST1H1D/HIST1H3G/H3F3B/AR/GPX8/HIST1H3A/STAT3/AJUBA/RPL39L/HIST1H4F/RPS6/HIST1H4A/PSME1/RPS24/TXN/CCNA1/RPL32/RPL29/HSPA13/RPL24/RPL10A/RPS18/RPL5/RPL10/RPL27/RPL12/SCMH1/EEF1A1/RPS13/RPS27A/LMNB1/HIF1A/RPL34/RPS20/ATP6V0E1/RPS28/EIF2S3/RRAGD/RPL26/RPS26/E2F2/RPL35/RPL6/RPS9/RPL30/RPS4X/NBN/RP…
R-HSA-388841	Costimulation by the CD28 family	62	1.69533	0.00254104	0.0357414	1.72743	0.0205978	916/9402/917/915/29851/3932/3122/4067/3127/29126/3117/3113/3123/5058/919/3115/1326/10000/5062/998	CD3E/GRAP2/CD3G/CD3D/ICOS/LCK/HLA-DRA/LYN/HLA-DRB5/CD274/HLA-DQA1/HLA-DPA1/HLA-DRB1/PAK1/CD247/HLA-DPB1/MAP3K8/AKT3/PAK2/CDC42
R-HSA-9012546	Interleukin-18 signaling	5	-1.70094	0.004751	0.0583132	-1.70343	0.0906875	3606/8807/8809	IL18/IL18RAP/IL18R1
R-HSA-1236975	Antigen processing-Cross presentation	96	1.57093	0.00665837	0.0712702	1.51755	0.066087	1515/567/3133/6890/1520/23480/6891/5720/4615/3106/3105/6233/695/3135/6892/50489/5685/3134/5716/5699/3107/7311/5698/5721/9902/5700/5689/9341/5710/5719/7316/9491/4688/10197/2923/5715/5690/7314/5691/7096/9554/114609/8773/5692/5708/5713/5686/3685/5711/5694/5684/5693/5702/5707/5701/8673/5695	CTSV/B2M/HLA-E/TAP1/CTSS/SEC61G/TAP2/PSME1/MYD88/HLA-B/HLA-A/RPS27A/BTK/HLA-G/TAPBP/CD207/PSMA4/HLA-F/PSMD10/PSMB10/HLA-C/UBA52/PSMB9/PSME2/MRC2/PSMC1/PSMB1/VAMP3/PSMD4/PSMD13/UBC/PSMF1/NCF2/PSME3/PDIA3/PSMD9/PSMB2/UBB/PSMB3/TLR1/SEC22B/TIRAP/SNAP23/PSMB4/PSMD2/PSMD7/PSMA5/ITGAV/PSMD5/PSMB6/PSMA3/PSMB5/PSMC3/PSMD1/PSMC2/VAMP8/PSMB7
R-HSA-983170	Antigen Presentation: Folding, assembly and peptide loading of class I MHC	25	1.93948	0.000296117	0.00840538	1.93776	0.0190318	567/3133/6890/6891/3106/3105/3135/51752/6892/3134/3107/10427/821/2923	B2M/HLA-E/TAP1/TAP2/HLA-B/HLA-A/HLA-G/ERAP1/TAPBP/HLA-F/HLA-C/SEC24B/CANX/PDIA3
